# The effect of background noise and its removal on the analysis of single-cell expression data

Philipp Janssen<sup>1</sup>, Zane Kliesmete<sup>1</sup>, Beate Vieth<sup>1</sup>, Xian Adiconis<sup>2,3</sup>, Sean Simmons<sup>2,3</sup>, Jamie Marshall<sup>4</sup>, Cristin McCabe<sup>2</sup>, Holger Heyn<sup>5</sup>, Joshua Z. Levin<sup>2,3</sup>, Wolfgang Enard<sup>1</sup>, Ines Hellmann<sup>1,\*</sup>

<sup>1</sup>Anthropology and Human Genomics, Faculty of Biology, Ludwig-Maximilians University, Munich, Germany

<sup>2</sup>Klarman Cell Observatory, Broad Institute of Harvard and MIT, Cambridge, MA USA

<sup>3</sup>Stanley Center for Psychiatric Research, Broad Institute of Harvard and MIT, Cambridge, MA USA

<sup>4</sup>Broad Institute of Harvard and MIT, Cambridge, MA USA

<sup>5</sup>CNAG-CRG, Centre for Genomic Regulation, Barcelona Institute of Science and Technology, Barcelona, Spain

\* correspondence:

Dr. Ines Hellmann, Telefon +49 (0)89 2180-74336

hellmann@bio.lmu.de, [www.anthropologie.bio.lmu.de](http://www.anthropologie.bio.lmu.de)

## Keywords

Single-Cell RNA-Sequencing, background noise, ambient RNA, barcode swapping, correction method comparison, (gold) standard scRNAseq data set

## Abstract

**BACKGROUND:** In droplet-based single-cell and single-nucleus RNA-seq experiments, not all reads associated with one cell barcode originate from the encapsulated cell. Such background noise is attributed to spillage from cell-free ambient RNA or barcode swapping events. Here, we characterize this background noise exemplified by three single-cell RNA-seq (scRNA-seq) and two single-nucleus RNA-seq (snRNA-seq) replicates of mouse kidney cells. For each experiment, kidney cells from two mouse subspecies were pooled, allowing to identify cross-genotype contaminating molecules and estimate the levels of background noise.

**RESULTS:** We find that background noise is highly variable across replicates and individual cells, making up on average 3-35% of the total counts (UMIs) per cell and show that this has a considerable impact on the specificity and detectability of marker genes. In search of the source of background noise, we find that expression profiles of cell-free droplets are very similar to expression profiles of cross-genotype contamination and hence that the majority of background molecules originates from ambient RNA. Finally, we use our genotype-based estimates to evaluate the performance of three methods (CellBender, DecontX, SoupX) that are designed to quantify and remove background noise. We find that CellBender provides the most precise estimates of background noise levels and also yields the highest improvement for marker gene detection. By contrast, clustering and classification of cells are fairly robust towards background noise and only small improvements can be achieved by background removal that may come at the cost of distortions in fine structure.

**CONCLUSION:** Our findings help to better understand the extent, sources and impact of background noise in single-cell experiments and provide guidance on how to deal with it.

## Background

Single cell and single nucleus RNA-seq (scRNA-seq, snRNA-seq) are in the process of revolutionizing medical and biological research. The typically sparse coverage per cell and gene is compensated by the capability of analyzing thousands of cells in one experiment. In droplet-based protocols such as 10x Chromium, this is achieved by encapsulating single cells in droplets together with beads that carry oligonucleotides. These usually consist of an oligo(dT) sequence which is used for priming reverse transcription, a bead-specific barcode that tags all transcripts encapsulated within the droplet and unique molecular identifiers (UMIs) that enable the removal of amplification noise [1, 2, 3]. As proof of principle that each droplet encapsulates only one cell, it is common to use mixtures of cells from human and mouse [3]. Thus doublets, droplets containing two cells, can be readily identified as they have an approximately even mixture of mouse and human transcripts. However, barcodes for which the clear majority of reads is either mouse or human, still contain a small fraction of reads from the other species [3, 4, 5]. Furthermore, presumably empty droplets also yield sequence reads [4].

One potential source of such contaminating reads or background noise is cell-free 'ambient' RNA that leaked from broken cells into the suspension. The other potential source are chimeric cDNA molecules that can arise during library preparation due to so-called 'barcode swapping'. The pooling of barcode tagged cDNA after reverse transcription but before PCR amplification, is a decisive step to achieve high throughput. However, if amplification of tagged cDNA molecules occurs from unremoved oligonucleotides from other beads or from incompletely extended PCR products (originally called template jumping [6]), this generates a chimeric molecule with a "swapped" barcode and UMI [7, 8]. When sequencing this molecule, the cDNA is assigned to the wrong barcode and hence 'contaminates' the expression profile of a cell. Another type of barcode swapping can occur during PCR amplification on a patterned Illumina flowcell before sequencing [9] with the same effects,

although double indexing of Illumina libraries has reduced this problem substantially. This 26  
said, here we focus on barcode swapping that occurs during library preparation. 27

Irrespective of the source of background noise, its presence can interfere with analyses. 28  
For starters, background noise reduces the separability of cell type clusters as well as the 29  
power to pinpoint important (marker) genes via differential expression analysis. Moreover, 30  
reads from cell type-specific marker genes spill over to cells of other types, thus yielding novel 31  
marker combinations and hence implying the presence of novel cell types [10, 8]. Besides, 32  
background noise can also confound differential expression analysis between samples, e.g. 33  
when looking for expression changes within a cell type between two conditions. Varying 34  
amounts of background noise or differences in the cell type composition between conditions 35  
can result in dissimilar background profiles, which might generate false positives when 36  
identifying differentially expressed genes. To alleviate such problems during downstream 37  
analysis, algorithms to estimate and correct for the amounts of background noise have been 38  
developed. 39

SoupX estimates the contamination fraction per cell using marker genes and then decon- 40  
volutes the expression profiles using empty droplets as an estimate of the background noise 41  
profile [11]. In contrast, DecontX defaults to model the fraction of background noise in a cell 42  
by fitting a mixture distribution based on the clusters of good cells [8], but also allows the 43  
user to provide a custom background profile, e.g. from empty droplets. CellBender requires 44  
the expression profiles measured in empty droplets to estimate the mean and variance of the 45  
background noise profile originating from ambient RNA. In addition, CellBender explicitly 46  
models the barcode swapping contribution using mixture profiles of the 'good' cells [4]. 47

In order to evaluate method performance, one dataset of an even mix between one mouse 48  
and one human cell line [3] is commonly used to get an experimentally determined lower 49  
bound of background noise levels that is identified as counts covering genes from the other 50  
species [4, 8, 11, 12]. Since this dataset is lacking in cell type diversity, it is common to 51

additionally evaluate performance based on other datasets that have a complex cell type 52  
mixture and where most cell types have well known profiles with exclusive marker genes. 53  
In such studies the performance test is whether the model removes the expression of the 54  
exclusive marker genes from the other cell types. In both cases, the feature space of the 55  
contamination does not overlap with the endogenous cell feature space. Mouse and human 56  
are too diverged, so that mouse reads only map to mouse genes and human reads only to 57  
human genes. Similarly, when using marker genes it is assumed that they are exclusively 58  
expressed in only one cell type, hence the features that are used for background inference 59  
are again not overlapping. However, in reality background noise will mostly induce shifts in 60  
expression levels that cannot be described in a binary on or off sense and it remains unclear 61  
how background correction will affect those profiles. 62

Here, we use a mouse kidney dataset representing a complex cell type mixture from three 63  
mouse strains of two subspecies, *Mus musculus domesticus* and *M.m.castaneus*. From both 64  
subspecies, inbred strains were used and thus we can distinguish exogenous and endogenous 65  
counts for the same features using known homozygous SNPs [13]. Hence, this dataset serves 66  
as a much more realistic experimental standard, providing a ground truth in a complex 67  
setting with multiple cell types which allows to analyze the variability, the source and the 68  
impact of background noise on single cell analysis. Moreover, this dataset enables us to 69  
better benchmark existing background removal methods. 70

## Mouse kidney single cell and single nucleus RNA-seq data 71

We obtained three replicates for single cell RNA-seq (rep1-3) data and two replicates for 72  
single nucleus RNA-seq (snRNA-seq, nuc2 & nuc3) data from the same samples that were 73  
used in scRNA-seq replicates 2 and 3, respectively. Each replicate consists of one channel of 74  
10x [3] in which cells from dissociated kidneys of three mice each were pooled: one *M.m.* 75  
*castaneus* from the strain CAST/EiJ (CAST) and two *M.m. domesticus*, one from the 76

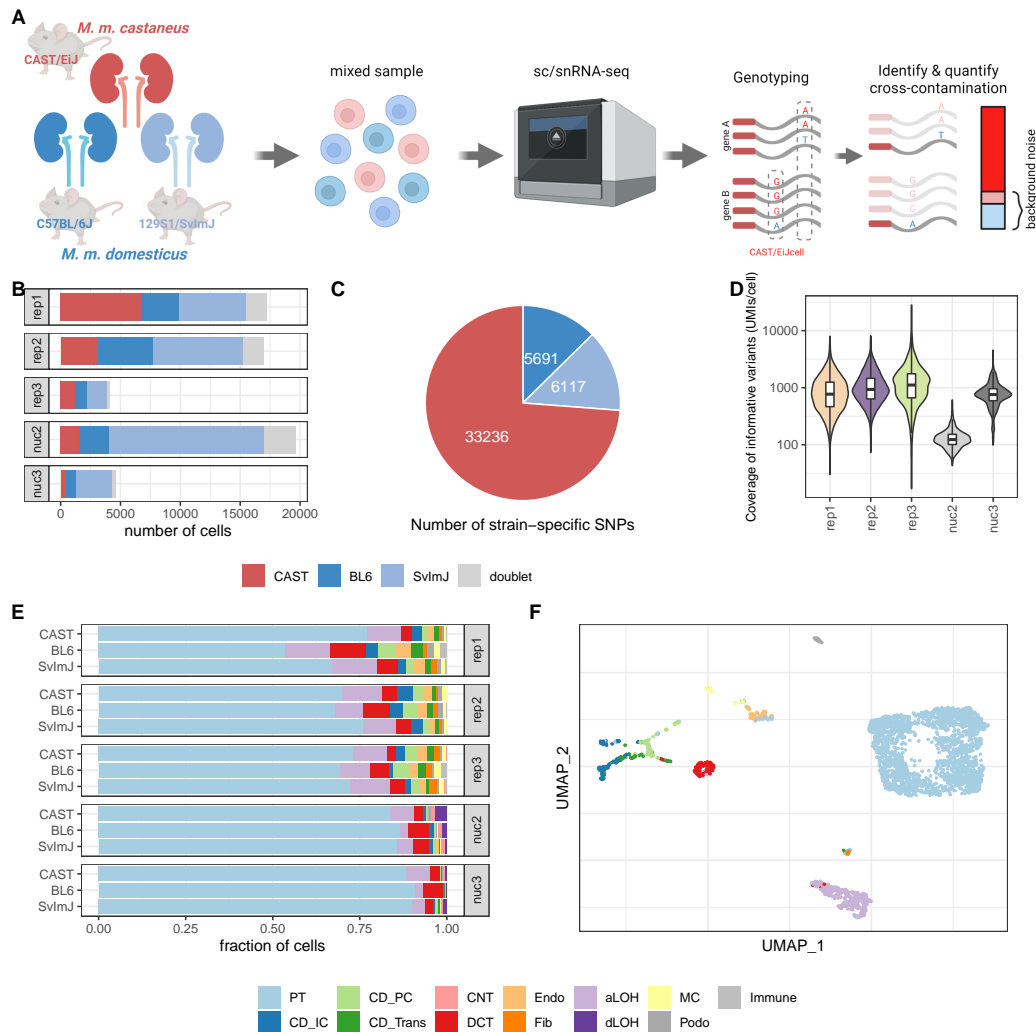

**Figure 1. Generation of mouse strain mixture datasets to quantify background noise.**

A) Experimental design. B) Strain composition in 5 different replicates, subjected to scRNA-seq (rep1-3) or snRNA-seq (nuc2,nuc3). The replicates rep2 & nuc2 and rep3 & nuc3 were generated from the same samples each. CAST: CAST/EiJ strain; BL6: C57BL/6J strain; SvImJ: 129S1/SvImJ. C) Number of homozygous SNPs with a coverage of more than 100 UMIs that distinguish one strain from the other two. D) Per cell coverage in *M. m. castaneus* cells of informative variants that distinguish *M. m. castaneus* and *M. m. domesticus* E) Cell type composition per replicate and strain; labels were obtained by reference-based classification using mouse kidney data from Denisenko et al. [14] as reference. F) UMAP visualization of *M. m. castaneus* cells in single-cell replicate 2, colored by assigned cell type. PT: proximal tubule; CD\_IC: intercalated cells of collecting duct; CD\_PC: principal cells of collecting duct; CD\_Trans: transitional cells of collecting duct; CNT: connecting tubule; DCT: distal convoluted tubule; Endo: endothelial; Fib: fibroblasts; aLOH: ascending loop of Henle; dLOH: descending loop of Henle; MC: mesangial cells; Podo: podocytes

strain C57BL/6J (BL6) and one from the strain 129S1/SvImJ (SvImJ) (Figure 1A). Based 77  
on known homozygous SNPs that distinguish subspecies and strains, we assigned cells to 78  
mice (Figure 1B). In total, we identified  $> 40,000$  informative SNPs of which the majority 79  
(32,000) separates the subspecies and  $\sim 10,000$  SNPs distinguish the two *M.m. domesticus* 80  
strains (Figure 1C). On average, each cell had sufficient coverage for  $\sim 1,000$  informative 81  
SNPs ( $\sim 20\%$  of total UMIs per cell) to provide us with unambiguous genotype calls for 82  
those sites. The coverage for the nuc2 data was much lower with only  $\sim 100$  SNPs (Figure 83  
1D). 84

Overall, each experiment yielded 5,000-20,000 good cells with 9-43% *M.m. castaneus* 85  
(Figure 1B). Thus, the majority of background noise in any *M.m. castaneus* cell is expected 86  
to be from *M.m. domesticus* and therefore we expect that genotype-based estimates of cell- 87  
wise amounts of background noise for *M.m. castaneus* to be fairly accurate (Supplementary 88  
figure S1). Hence from here on out we focus on *M.m. castaneus* cells for the analysis of 89  
the origins of background noise and also as the ground truth for benchmarking background 90  
removal methods. 91

This dataset has two advantages over the commonly used mouse-human mix [3]. Firstly, 92  
the kidney data have a high cell type diversity. Using the data from Denisenko et al. [14] 93  
as reference dataset for kidney cell types, we could identify 13 cell types. Encouragingly, 94  
the cell type composition is very similar across mouse strains as well as replicates with 95  
proximal tubule cells constituting 66-89% of the cells (Figure 1E,F, Supplementary Figure S2). 96  
Secondly, due to the higher similarity of the mouse subspecies, we can identify contaminating 97  
reads for the same features.  $\sim 7,000$  genes carry at least one informative SNP about the 98  
subspecies allowing us to quantify contaminating reads from the other mice. 99

## Background noise fractions differ between replicates and cells 100

Around 20% of the UMI counts are from molecules that contain a SNP that is informative 101  
about the subspecies of origin. We quantify in each cell how often an endogenous *M.m.* 102  
*castaneus* allele or a foreign *M.m. domesticus* allele was covered. Assuming that the count 103  
fractions covering the SNPs are representative of the whole cell, we detect a median of 104  
2%-27% counts from the foreign genotype over all cells per experiment (Supplementary 105  
Figure S3A). This observed cross-genotype contamination fraction represents a lower bound 106  
of the overall amounts of background noise. As suggested in Heaton et al. [15], we then 107  
integrate over the foreign allele fractions of all informative SNPs to obtain a maximum 108  
likelihood estimate of the background noise fraction ( $\rho_{cell}$ ) of each cell that extrapolates to 109  
also include contamination from the same genotype (see Methods, Supplementary figure S1). 110  
Based on these estimates, we find that background noise levels vary considerably between 111  
replicates and do not appear to depend on the overall success of the experiment measured as 112  
the cell yield per lane (Figure 2). For example in scRNA-seq rep3 (3,900 cells), we detected 113  
overall the fewest good cells, but most of those cells had less than 3% background noise, 114  
while the much more successful rep2 (15,000 cells) we estimated the median background 115  
noise level at around 11% (Figure 2A). This said, the snRNA-seq data generated from frozen 116

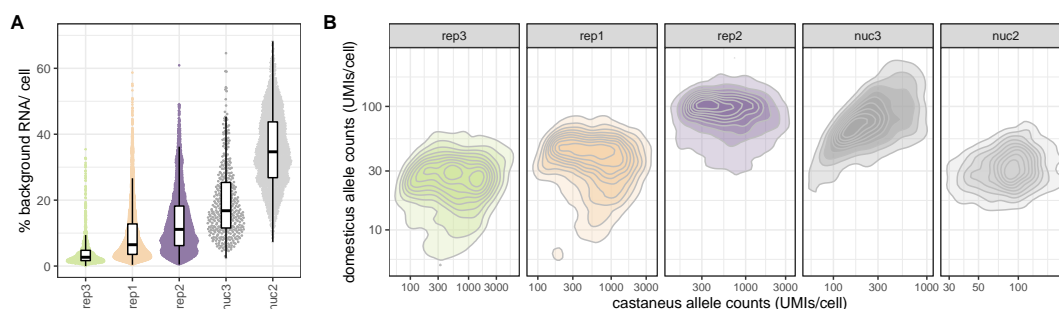

**Figure 2. The level of background noise is variable across replicates and single cells.** A) Estimated fraction of background noise per cell. The replicates on the x-axis are ordered by ascending median background noise fraction. B) In *M.m. castaneus* cells both endogenous *M.m. castaneus* specific alleles (x-axis) and *M.m. domesticus* specific alleles (y-axis) have coverage in each cell. The detection of *M.m. domesticus* specific alleles can be seen as background noise originating from cells of a different mouse.



tissue have much higher background levels than the corresponding scRNA-seq replicates - 117  
35% in nuc2 vs. 11% rep2 and 17% in nuc3 vs. 3% in rep3. The number of contaminating 118  
RNA-molecules (UMIs) depends only weakly on the sequencing depth of the cell (Figure 2B). 119  
Such a weak correlation could be explained by variation in the capture efficiency in each 120  
droplet. An alternative, but not mutually exclusive explanation of such a correlation could 121  
be that the source of some contaminating molecules is barcode swapping that can occur 122  
during library amplification. Again the snRNA-seq replicates show a stronger correlation 123  
between contaminating and endogenous counts, which can be explained by a stronger impact 124  
of the variation in capture efficiency and/or higher levels of barcode swapping. 125

However, by and large the absolute amount of background noise is approximately constant 126  
across cells and thus the contamination fraction mainly depends on the amount of endogenous 127  
RNA: the larger the cell, the smaller the fraction of background noise, pointing towards 128  
ambient RNA as the major source of the detected background (Figure 2B). 129

## **The background noise profile does not always reflect the cell 130 type composition 131**

In order to better understand the effects of background noise, it is helpful to understand 132  
its origins and composition. To this end, we constructed pseudobulk profiles representing 133  
endogenous, contaminating and ambient expression profiles by using *M. m. domesticus* 134  
allele counts in *M. m. domesticus* cells (endogenous), *M. m. domesticus* allele counts in *M.* 135  
*m. castaneus* cells (contamination) and *M. m. domesticus* allele counts in empty droplets 136  
(empty) (Figure 3A, Supplementary Figure S4). In case of the three scRNA-seq replicates, 137  
we find that the contamination profiles correlate highly and similarly well with empty profiles 138  
(Spearman's  $\rho = 0.73 - 0.85$ ) and endogenous profiles (Spearman's  $\rho = 0.70 - 0.87$ ), while 139  
for the two snRNA-seq replicates the contamination profiles are clearly more similar to the 140

empty (Spearman's  $\rho \sim 0.85$ ) than to the endogenous profiles (Spearman's  $\rho \sim 0.50$ ) (Figure 141  
3B). 142

Using deconvolution [16], we reconstructed the cell type composition of the pseudobulk 143  
profiles, and, in agreement with the correlation analysis, we find that in the scRNA-seq data 144  
the cell type compositions inferred for endogenous, contamination and empty counts are by 145  
and large similar with a slight increase in the PT-profile in empty droplets, suggesting that 146  
this cell type is more vulnerable to dissociation procedure than other cell types. In contrast, 147  
deconvolution of the empty droplet and contamination fraction of our snRNA-seq data, that 148  
in contrast to the scRNA-seq data were prepared from frozen samples, shows a clear shift in 149  
cell type composition with a decreased PT fraction (Figure 3C, Supplementary Figure S5). 150

Moreover, for the snRNA-seq data we expect that cytosolic mRNA contributes more 151  
to the contaminating profile than to the endogenous profile. Indeed, we find that in good 152  
nuclei (endogenous molecules) more than 25% of the allele counts fall within introns, while 153  
out of the molecules from empty droplets less than 18% fall within introns (Figure 3D). 154  
The intron fraction of the contaminating molecules lies in-between the endogenous and the 155  
empty droplet fraction, but is in all cases much closer to the empty intron fraction, thus 156  
suggesting again that the majority of the background noise likely originates from ambient 157  
RNA. However, the slight increase in the intron fraction of the contamination relative to 158  
empty droplets suggests that at least a small part of the observed background noise is due 159  
to barcode swapping. 160

## **The impact of contamination on marker gene analyses** 161

The ability to distinguish hitherto unknown cell types and states is one of the greatest 162  
achievements made possible by single cell transcriptome analyses. To this end, marker 163  
genes are commonly used to annotate cell clusters for which available classifications appear 164  
insufficient. An ideal marker gene would be expressed in all cells of one type but in none of 165

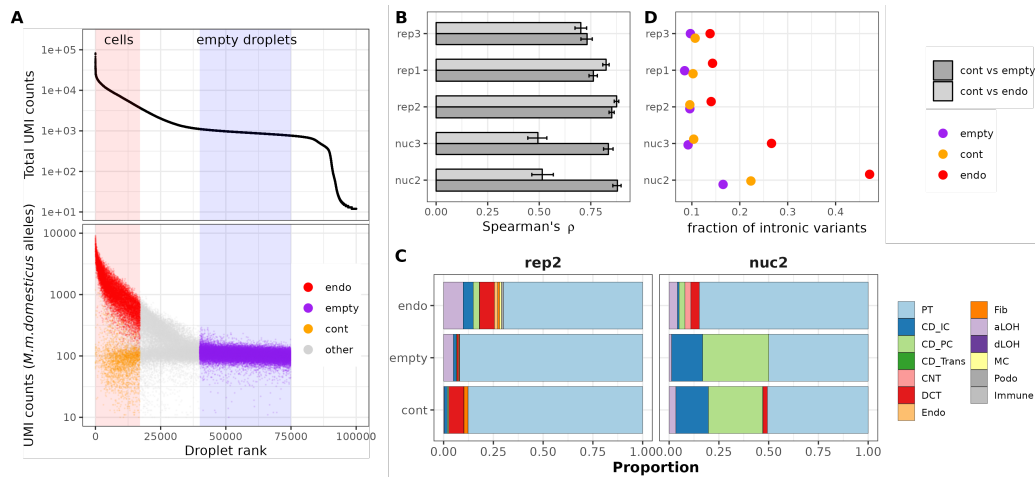

**Figure 3. Characterization of ambient RNA in cells and empty droplets.** A) Ordering droplet barcodes by their total UMI count to distinguish cell-containing droplets with high UMI counts from empty droplets that only contain cell-free ambient RNA and are identifiable as a plateau in the UMI curve, shown here for replicate 2. UMI counts of reads covering *M.m.domesticus* specific alleles were used to construct three profiles depending on whether they were associated with *M.m.domesticus* cell barcodes (endogenous counts, endo), *M.m.castaneus* cell barcodes (contaminating counts, cont) or empty droplet barcodes (empty). Counts from droplets that are not clearly assignable as cell-containing or empty were excluded from further analysis (other). B) Spearman rank correlation between pseudobulk profiles. C) Deconvolution of cell type contributions to each pseudobulk profile, exemplified by replicates rep2 and nuc2. The stacked barplots depict the estimated fraction of each cell type in the profile as inferred by SCDC using the annotated single cell data of each replicate as reference. PT: proximal tubule; CD\_IC: intercalated cells of collecting duct; CD\_PC: principal cells of collecting duct; CD\_Trans: transitional cells of collecting duct; CNT: connecting tubule; DCT: distal convoluted tubule; Endo: endothelial; Fib: fibroblasts; aLOH: ascending loop of Henle; dLOH: descending loop of Henle; MC: mesangial cells; Podo: podocytes. D) Fraction of reads covering intronic variants in each of the three profiles.

the other present cell types. Thus, when comparing expression levels of one cell type versus 166  
all others, we expect high log<sub>2</sub>-fold changes, the higher the change the more reliable the 167  
marker. However, such a reliance on marker genes also makes this type of analysis vulnerable 168  
to background noise. Our whole kidney data can illustrate this problem well, because with 169  
the very frequent proximal tubular (PT) cells we have a dominant cell type for which rather 170  
specific marker genes are known [17]. Slc34a1 encodes a phosphate transporter that is known 171  
to be expressed exclusively in PT cells [18, 19]. As expected, it is expressed highly in PT 172  
cells, but it is also present in a high fraction of other cells (Figure 4A,E, Supplementary 173  
Figure S6). Moreover, the log<sub>2</sub>-fold changes of Slc34a1 are smaller in replicates with larger 174  
background noise, indicating that the detection of Slc34a1 in non-PT cells is likely due 175  
to contamination (Figure 4B-D). We observe the same pattern for other marker genes as 176  
well: they are detected across all cell types (Figure 4E, Supplementary Figure S7) and 177  
an increase of background noise levels goes along with decreasing log<sub>2</sub>-fold changes and 178  
increasing detection rates in other cell types (Figure 4F,G). Thus, the power to accurately 179  
detect marker genes decreases in the presence of background noise. 180

## Benchmark of background noise estimation tools 181

Given that background noise will be present to varying degrees in almost all scRNA-seq and 182  
snRNA-seq replicates, the question is whether background removal methods can alleviate 183  
the problem without the information from genetic variants. SoupX [11], DecontX [16] and 184  
CellBender [4], all provide an estimate of the background noise level per cell. Here, we use 185  
our genotype-based background estimates as ground truth to compare it to the estimates of 186  
the three background removal methods (Figure 5A, Supplementary Figure S8). All methods 187  
have adjustable parameters, but also provide a set of defaults. For CellBender the user 188  
can adjust the nominal false positive rate to put a cap on losing information from true 189  
counts. For SoupX and DecontX the resolution of the clustering of cells that is later used to 190

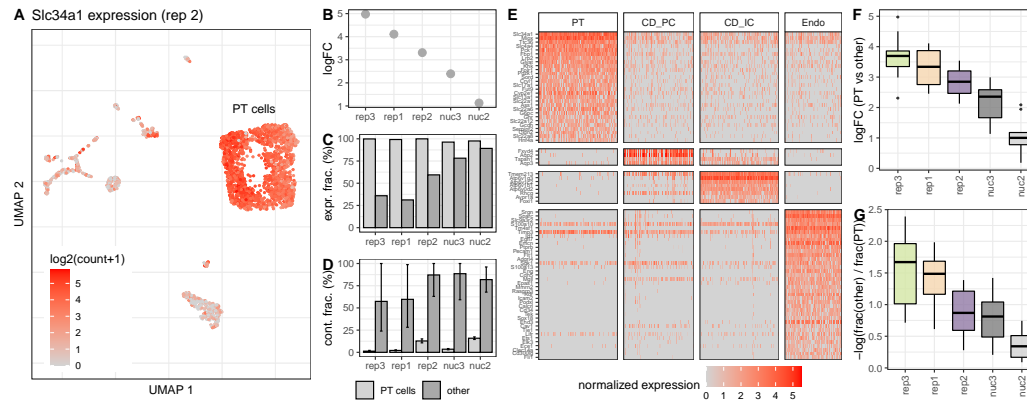

**Figure 4. Background noise affects differential expression and specificity of cell type specific marker genes.** A) UMAP representation of replicate 2 colored by the expression of *Slc34a1*, a marker gene for cells of the proximal tubule (PT). Besides high counts in a cluster of PT cells, *Slc34a1* is also detected in other cell type clusters. Differential expression analysis between PT and all other cells shows a decrease of the detected log fold change of *Slc34a1* (B) at higher background noise levels, as well as an increase of the fraction of non PT cells in which UMI counts of *Slc34a1* were detected (C). D) Estimation of the background noise fraction of *Slc34a1* expression indicates that the majority of counts in non PT cells originates from background noise. Error bars indicate 90% profile likelihood confidence intervals. E) Heatmap of marker gene expression for four cell types in replicate 2, downsampled to a maximum of 100 cells per cell type. F) Comparison across replicates of log2 fold changes of 10 PT marker genes calculated based on the mean expression in PT cells against mean expression in all other cells. G) For the same set of genes as in E), the log ratio of fraction of cells in which a gene was detected in others and PT cells shows how specific the gene is for PT cells.

model the endogenous counts can be adjusted. In addition, SoupX can be provided with 191  
an expected background level and for DecontX the user can provide a custom background 192  
profile rather than using the default estimation strategy for the background profile. At 193  
least with our reference dataset, CellBender does not seem to profit from changing the 194  
defaults, while SoupX's performance is boosted, if provided with realistic background levels 195  
(Supplementary Figure S13). Because in a real case scenario, the true background level 196  
is unknown, we decided to report the SoupX performance metrics under default settings. 197  
DecontX defaults to estimating the putative background profile from averaging across intact 198  
cells, but also gives the user the possibility to provide another profile, such as the profile 199  
of empty droplets as used in CellBender and SoupX. To ensure comparability, we report 200  
DecontX's performance with empty droplets as background profile (*DecontX<sub>background</sub>*) in 201  
addition to DecontX with default settings (*DecontX<sub>default</sub>*). 202

We find that CellBender and DecontX can estimate background noise levels similarly 203  
well for the scRNA-seq replicates, while SoupX tends to underestimate background levels 204

and also cannot capture the cell to cell variation as measured by the correlation with the 205  
ground truth (Figure 5B). For the snRNA-seq data, SoupX performs better at estimating 206  
global background levels, but as for the scRNA-seq still cannot capture cell to cell variation. 207  
In contrast, both CellBender and DecontX perform worse with the snRNA-seq data than 208  
with the scRNA-seq data. In the case of DecontX, the default setting provides much worse 209  
estimates than the estimates using empty droplets as background profile. 210

All in all, CellBender shows the most robust performance across replicates with default 211  
settings, while DecontX' and SoupX' performance seems to require parameter tuning. In the 212  
case of DecontX the default works well for scRNA-seq data, but not for snRNA-seq data, 213  
while for SoupX the opposite is true. 214

A drawback of CellBender is its runtime. While SoupX and DecontX take seconds 215  
and minutes to process one 10x channel, CellBender takes  $\sim 45$  CPU hours. However, 216  
parallelization is possible. 217

All methods struggle most with the nuc3 replicate that has the fewest *M.m. castaneus* 218  
cells and the lowest cell type diversity among our five data sets (Figure 1B,E). This also 219  
presents a problem for other downstream analyses and thus we do not consider nuc3 further. 220

## Effect of background noise removal on marker gene detection 221

Above we have shown that computational methods can estimate background noise levels 222  
per cell. Moreover, all three methods provide the user with a background corrected count 223  
matrix for downstream analysis. Here, we compare the outcomes of marker gene detection, 224  
clustering and classification when using corrected count matrices from SoupX, DecontX and 225  
CellBender (Figure 6A, Supplementary Figure S9). To characterize the impact on marker 226  
gene detection, we first check in how many cells an unexpected marker gene was detected; 227  
for example, how often Slc34a1 was detected in cells other than PTs (Figure 6B). Without 228  
correction we find Slc34a1 reads in  $\sim 60\%$  of non-PT cells of scRNA-seq rep2, SoupX reduces 229

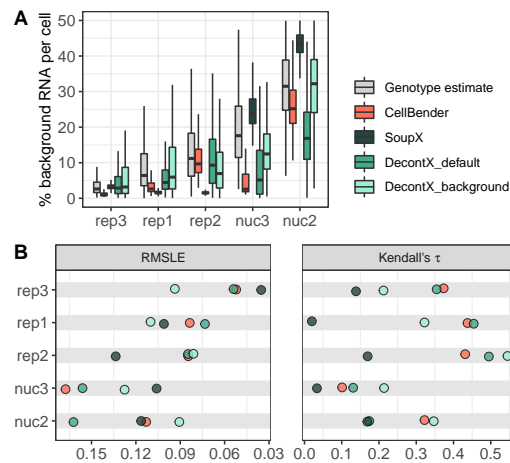

**Figure 5. Accuracy of computational background noise estimation.** A) Estimated background noise levels per cell based on genetic variants (grey) and different computational tools. B) Taking the genotype-based estimates as ground truth, Root Mean Squared Logarithmic Error (RMSLE) and Kendall rank correlation serve as evaluation metrics for cell-wise background noise estimates of different methods. Low RMSLE values indicate high similarity between estimated values and the assumed ground truth. High values of Kendall's  $\tau$  correspond to good representation of cell to cell variability in the estimated values.

this rate to 54%, CellBender to 7% and DecontX<sub>background</sub> to 9%. DecontX<sub>default</sub> manages 230  
to remove most contaminating reads reducing the Slc34a1 detection rate outside PTs to 231  
2%. While we find a similar ranking when averaging across several marker genes from 232  
the PanglaoDB database [17] and scRNA-seq replicates (Figure 6C), the ranking changes 233  
for nuc2: DecontX<sub>default</sub> fails: after correction, Slc34a1 is still found in 87% of non-PT 234  
cells while DecontX<sub>background</sub> is better with a rate of 20%. Here, CellBender and SoupX 235  
are clearly better with reducing the Slc34a1 detection rate to 4% and < 1%, respectively 236  
(Supplementary Figure S10). 237

Even though the changes in the marker gene detection rates outside the designated cell 238  
type seem dramatic, with moderate background levels as e.g. in rep2, the identification of 239  
marker genes [20] is affected only a little. CellBender correction has the largest effect on 240  
marker gene detection, yet 8 from the top 10 genes without correction remain marker genes 241  
with CellBender correction (Spearman's correlation for top 100  $\rho = 0.84$ ). In contrast, in 242  
the nuc2 data with high background levels, the change in marker gene detection is dramatic. 243  
Here, only one of the top 10 marker genes remains after correction (Spearman's correlation 244

for top 100  $\rho = 0.04$ ). The largest improvement is achieved with CellBender: After correction, 245  
four out of the top 10 were known marker genes [17], while this overlap amounted to only one 246  
in the raw data (Supplementary Figure S11B). Moreover, we find that background removal 247  
also increases the detected log-fold-changes of known marker genes across all replicates and 248  
methods, with CellBender providing the largest improvement (Figure 6D, Supplementary 249  
Figure S11C). 250

## Effect of background noise removal on classification and clustering 251 252

One of the first and most important tasks in single cell analysis is the classification of cell 253  
types. As described above, we could identify 13 cell types in our uncorrected data using 254  
an external single cell reference dataset [14, 21]. Going through the same classification 255  
procedure after correction for background noise, changes the classification of only very few 256  
cells (Figure 6A, Supplementary Figure S9). For the scRNA-seq experiments  $< 1\%$  and for 257  
the snRNA-seq data up to 1.3% of cells change labels after background removal compared 258  
to the classification using raw data. Before correction, these cells are mostly located in 259  
clusters dominated by a different cell type (Figure 6A). Moreover, these cells tend to have 260  
higher background levels as exemplified by the PT-marker gene *Slc34a1* (Figure 6B). Finally, 261  
background removal - irrespective of the method - improves the classification prediction 262  
scores (Figure 6E, Supplementary Figure S12). Together, this indicates that background 263  
removal improves cell classification. 264

Similarly, background removal also results in more distinct clusters. Here, we reason that 265  
cells of the same cell type should cluster together and evaluate the impact of background 266  
removal 1) on the silhouette scores for cell types and 2) on the cell type purity of each 267  
cluster using unsupervised clustering (Figure 6E). For the scRNA-seq data DecontX results 268



in the purest and most distinct clusters, while for the snRNA-seq data SoupX wins in these 269  
categories. 270

All in all, it seems clear that all background removal methods sharpen the broad structure 271  
of the data a little, but how about fine structure? To answer this question, we turn again 272  
to the genotype cleaned data to obtain a ground truth for the  $k$ -nearest neighbors of a 273  
cell and calculate how much higher the overlap of the background corrected data is with 274  
this ground truth as compared to using the raw data (Figure 6E). For the scRNA-seq data, 275  
DecontX has the largest improvement on the broad structure, but at same time in particular 276  
DecontX<sub>background</sub> lowers the overlap in  $k$ -NN with our assumed ground truth, suggesting 277  
that this change in structure is a distortion rather than an improvement. SoupX leaves the 278  
fine structure by and large unchanged in the scRNA-seq data, while both CellBender and 279  
DecontX make the fine structure slightly worse. In contrast, for the high background levels 280  
of the nuc2, all background removal methods achieve an improvement, with SoupX and 281  
CellBender performing best. 282

## Discussion 283

Here we provide a dataset for the characterization of background noise in 10x Genomics 284  
data that is ideal to benchmark background removal methods. The mixture of cell types 285  
in our kidney data provides us with realistic cell type diversity and the mixture of mouse 286  
subspecies enables us to identify foreign alleles in a cell, thus resulting in a dataset that 287  
allows us to quantify background noise across diverse cell types and features. Moreover, the 288  
replicates have very different contamination levels, making it possible to assess the impact 289  
of low, intermediate and high background levels. As expected, marker gene identification is 290  
affected and markers appear less specific, as they are detected in cell types where they are 291  
not expressed. The severity of the issue directly depends on background noise levels (Figure 292  
4). This particular problem has been observed previously and has been used as a premise to 293

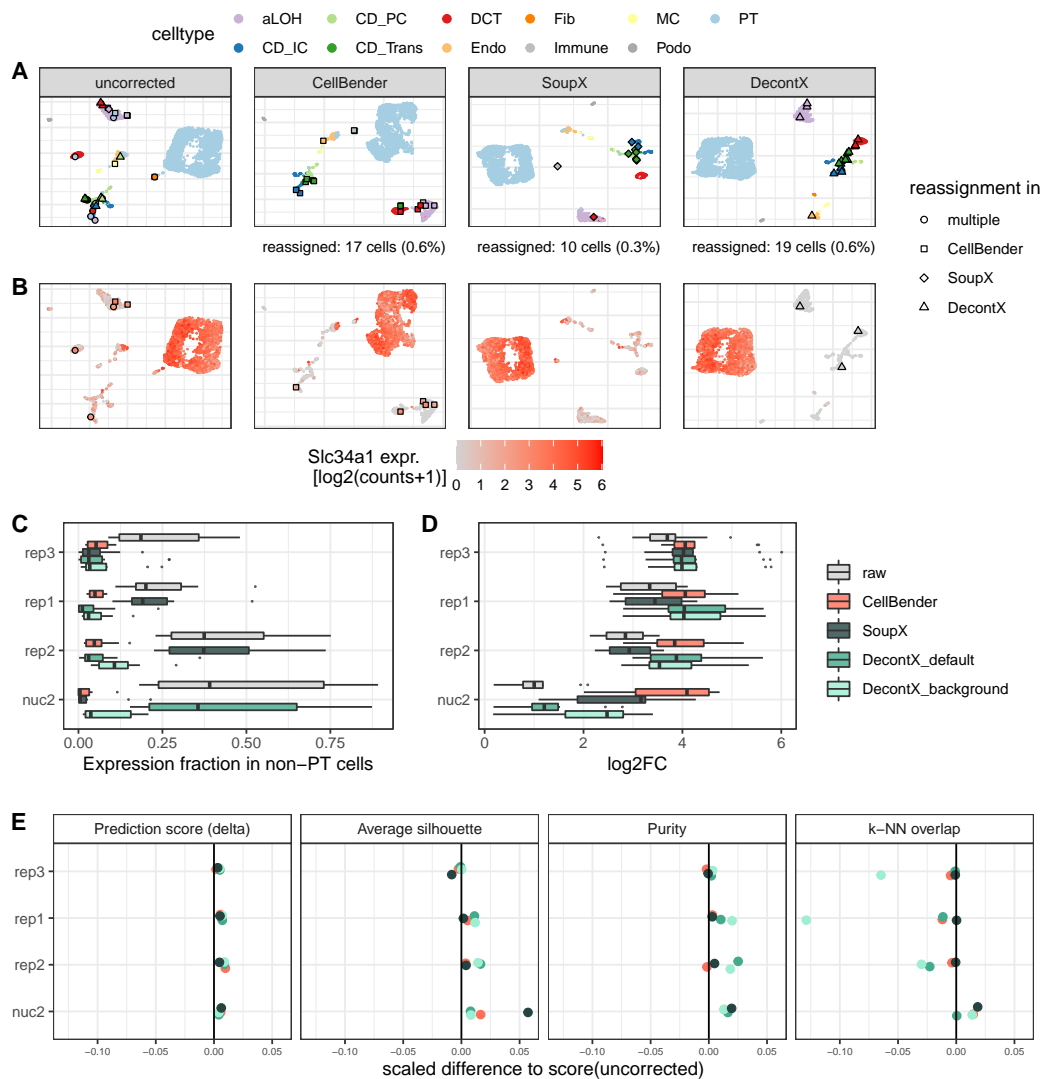

**Figure 6. Effect of Background removal on downstream analysis.** A) UMAP representation of replicate 2 single-cell data before and after background noise correction, colored by cell type labels obtained from reference based classification. Individual cells that received a new label after correction are highlighted. PT: proximal tubule; CD\_IC: intercalated cells of collecting duct; CD\_PC: principal cells of collecting duct; CD\_Trans: transitional cells of collecting duct; CNT: connecting tubule; DCT: distal convoluted tubule; Endo: endothelial; Fib: fibroblasts; aLOH: ascending loop of Henle; dLOH: descending loop of Henle; MC: mesangial cells; Podo: podocytes B) Expression of the PT cell marker *Slc34a1* before and after background noise correction in replicate 2. Cells that were classified as PT cells in the uncorrected data, but got reassigned after correction, are highlighted. C),D) Differential expression analysis of 10 PT markers, evaluating the expression fraction in non-PT cells (C) and the log2 fold change between PT and all other cells (D). E) Evaluation metrics for the effect of background noise correction on classification and clustering. For each metric the change relative to the uncorrected data is depicted. The values were scaled by the possible range of each metric. Prediction score: cell-wise score "delta" of reference based classification with SingleR [21]. Average silhouette: Mean of silhouette widths per cell type. Purity: Cluster purity calculated on cell type labels as ground truth and Louvain clusters as test labels. *k*-NN overlap: overlap of the *k*=50 nearest neighbors per cell compared to genotype-cleaned reference *k*-NN graph.

develop background correction methods [22, 4, 11]. 294

The novelty of this analysis is that - thanks to the mix of mouse subspecies - we are able 295  
to obtain expression profiles that describe the source of contamination in each sample and 296  
also have a ground truth for a more realistic dataset. We started to characterize background 297  
noise by comparing the contamination profile with the profile of empty droplets and that 298  
of endogenous counts of good cells. In agreement with the idea that ambient RNA is 299  
due to leakage of cytosol, we find that empty droplets show less evidence for unspliced 300  
mRNA molecules and that the unspliced fraction in the contamination profiles is similar to 301  
that of empty droplets, suggesting that the majority of the detected background noise is 302  
due to ambient RNA. Only in the snRNA-seq dataset nuc2 the unspliced fraction of the 303  
contamination profile is clearly higher than for empty droplets, providing evidence for at 304  
least some barcode swapping (Figure 3C). Hence, the observed correlation between cell size 305  
and the absolute amounts of background noise per cell in most of the replicates is likely due 306  
to variation in dropout rates [4] (Figure 2B). 307

Another important insight from comparing contamination, empty and endogenous profiles 308  
is that we can deduce the origin of the contamination. While for the scRNA-seq data all 309  
three profiles are highly correlated and are the result of very similar cell type mixtures, for 310  
the snRNA-seq data the empty and the contamination profiles are distinct from the expected 311  
endogenous mixture profile. Encouragingly the endogenous profile of the snRNA-seq data 312  
agrees well with the cell type proportions from our scRNA-seq data as well as the literature 313  
[14, 23], suggesting that neither library preparation method introduces a strong cell type 314  
bias. Moreover, the higher similarity between the empty and the contamination profiles 315  
strongly supports again that the majority of background noise is ambient RNA and hence 316  
using the empty rather than the endogenous profile as a reference to model background noise 317  
is a good choice. Indeed, the performance of DecontX for nuc2 is improved by providing the 318  
empty droplet profile as compared to the endogenous profile which is the default (Figure 319

5A). We also observed that SoupX performs much better for the snRNA-seq data than the 320  
scRNA-seq data. We speculate that the marker gene identification that is the basis for 321  
estimating the experiment-wide average contamination is hampered by the fact that our 322  
dataset has one very dominant cell type that has the same prevalence in the empty droplets, 323  
thus masking all background. However, even if SoupX gets the overall background levels 324  
right, it by design grossly underestimates the variance among cells and cannot capture the 325  
cell to cell variation (Figure 5B,C). Overall CellBender provides the most accurate estimates 326  
of the background noise levels and also captures the cell to cell variation rather well. 327

In line with this, marker gene detection is most improved by CellBender, which is the only 328  
method that removes marker gene molecules from other cell types and increases the log-fold- 329  
change consistently well. The effect of background removal on other downstream analyses is 330  
much more subtle. For starters, classification using an external reference is rather robust. 331  
Even with high levels of background noise, background removal improves classification only 332  
for a handful of cells and we cannot say that one method outperforms the others (Figure 333  
6E, Supplementary Figure S12). Similarly, the broad structure of the data improves only 334  
minimally and this minimal improvement comes at the cost of disrupting fine structure 335  
(Figure 6E). Here, again CellBender strikes the best balance between removing variation 336  
but preserving the fine structure, while DecontX tends to remove too much within-cluster 337  
variability, as the  $k$ -NN overlap with the genotype-based ground truth for DecontX is even 338  
lower than for the raw data. All in all, CellBender shows the best performance in removing 339  
background noise. 340

## Conclusion 341

Levels of background noise can be highly variable within and between replicates and 342  
the contamination profiles do not always reflect the cell type proportions of the sample. 343  
Marker gene detection is affected most by this issue, in that known cell type specific 344

marker genes can be detected in cell clusters where they do not belong. Existing methods 345  
for background removal are good at removing such stray marker gene molecule counts. 346  
In contrast, classification and clustering of cells is rather robust even at high levels of 347  
background noise. Consequently, background removal improves the classification of only 348  
few cells. Moreover, it seems that for low and moderate background levels the tightening of 349  
existing broad structures may go at the cost of fine structure. In summary, for marker gene 350  
analysis, we would always recommend background removal, but for classification, clustering 351  
and pseudotime analyses, we would only recommend background removal when background 352  
noise levels are high. 353

## Methods 354

### Mice 355

Three mouse strains were ordered from Jackson Laboratory at 6-8 weeks of age: C57BL/6J 356  
(000664), CAST/EiJ (000928), and 129S1/SvImJ (002448). All animals were subjected to 357  
intracardiac perfusion of PBS to remove blood. Kidneys were dissected, divided into 1/4s, 358  
and subjected to the tissue dissociation protocol, stored in RNAlater, or snap-frozen in 359  
liquid nitrogen. 360

### Tissue dissociation for single cell isolation 361

The single cell suspensions were prepared following an established protocol [24] with minor 362  
modifications. In detail, one of each kidney sagittal quarter from three perfused mice of 363  
different strains C57BL/6, CAST/EiJ and 129S1/SvImJ were harvested into cold RPMI 364  
(Thermo Fisher Scientific, 11875093) with 2% heat-inactivated Fetal Bovine Serum (Gibco, 365  
Thermo Fisher Scientific, 16140-071; FBS) and 1% penicillin/streptomycin (Gibco, Thermo 366  
Fisher Scientific, 15140122). Each piece of the tissue was then minced for 2 minutes with a 367  
razor blade in 0.5 ml 1x liberase TH dissociation medium (10x concentrated solution from 368

Millipore Sigma, 05401135001, reconstituted in DMEM/F12(Gibco, Thermo Fisher Scientific, 369  
11320-033 in a petri dish on ice. The chopped tissue pieces were then pooled into one 1.5 ml 370  
Eppendorf tube and incubated in a thermomixer at 37°C for 1 hour at 600rpm with gentle 371  
pipetting for trituration every 10 minutes. The digestion mix was then transferred to a 15 372  
ml conical tube and mixed with 10 ml 10% FBS RPMI. After centrifugation in a swinging 373  
bucket rotor at 500g for 5 min at 4°C and supernatant removal, the pellet was resuspended 374  
in 1ml red blood cell lysing buffer (Sigma Aldrich, R7757). The suspension was spun down 375  
at 500g for 5 min at 4°C followed by supernatant removal. The pellet cleared of the red 376  
blood cell ring was then resuspended in 250 µl Accumax (Stemcell Technologies, 7921) and 377  
incubated at 37°C for 3 mins. The reaction was stopped by mixing with 5 ml 10% FBS 378  
RPMI and spinning down at 500g for 5 min at 4°C followed by supernatant removal. The 379  
cell pellet was then resuspended in PBS with 0.4% BSA (Sigma, B8667) and passed through 380  
a 30 µm filter (Sysmex, 04-004-2326). The cell suspension was then assessed for viability 381  
and concentration using the K2 Cellometer (Nexcelom Bioscience) with the AOPIcell stain 382  
(Nexcelom Bioscience, CS2-0106-5ML). 383

### **Nuclei isolation from RNALater preserved frozen tissue** 384

The single nuclei suspensions were prepared following an established protocol [25] with minor 385  
modifications. In detail, the RNALater reserved frozen tissue of 3 mice kidney quarters were 386  
thawed and transferred to one petri dish preloaded with 1 ml TST buffer containing 10 mM 387  
Tris, 146 mM NaCl, 1 mM CaCl<sub>2</sub>, 21 mM MgCl<sub>2</sub>, 0.03% Tween-20 (Roche, 11332465001) 388  
and 0.01% BSA (Sigma, B8667). It was minced with a razor blade for 10 minutes on ice. 389  
The homogenized tissue was then passed through a 40 µm cell strainer (VWR, 21008-949) 390  
into a 50 ml conical tube. One ml TST buffer was used to rinse the petri dish and collect the 391  
remaining tissue into the same tube. It was then mixed with 3 ml of ST buffer containing 10 392  
mM Tris, 146 mM NaCl, 1 mM CaCl<sub>2</sub> and 21 mM MgCl<sub>2</sub> and spun down at 500g for 5 min 393

at 4°C followed by supernatant removal. In the second experiment this washing step was 394  
repeated 2 more times. The pellet was resuspended in 100 µl ST buffer and passed through 395  
a 35 µm filter. The nuclei concentration was measured using the K2 Cellometer (Nexcelom 396  
Bioscience) with the AO nuclei stain (Nexcelom Bioscience, CS1-0108-5ML). 397

### **Single-cell and single-nucleus RNA-seq** 398

The cells or nuclei were loaded onto a 10x Chromium Next GEM G chip (10x Genomics, 399  
1000120) aiming for recovery of 10,000 cells or nuclei. The RNA-seq libraries were prepared 400  
using the Chromium Next GEM Single Cell 3' Reagent kit v3.1 (10x Genomics, 1000121) 401  
following vendor protocols. The libraries were pooled and sequenced on NovaSeq S1 100c 402  
flow cells (Illumina) with 28 bases for read1, 55 bases for read2 and 8 bases for index1 and 403  
aiming for 20,000 reads per cell. 404

### **Processing and annotation of scRNA-seq and snRNA-seq data** 405

The scRNA-seq and snRNA-seq data were processed using Cell Ranger 3.0.2 using as 406  
reference genome and annotation mm10 version 2020A for the scRNA-seq data and and 407  
a pre-mRNA version of mm10 2.1.0 as reference for snRNA-seq. In order to identify cell 408  
containing droplets we processed the raw UMI matrices with the DropletUtils package [5]. 409  
The function barcodeRanks was used to identify the inflection point on the total UMI curve 410  
and the union of barcodes with a total UMI count above the inflection point and Cell Ranger 411  
cell call were defined as cells. 412

For cell type assignment we used 3 scRNA-seq and 4 snRNA-seq experiments from 413  
Denisenko et al. [14] as a reference. Cells labeled as "Unknown" (n=46), "Neut" (n=17) 414  
and "Tub" (n=1) were removed. The reference was log-normalized and split into seven 415  
count matrices based on chemistry, preservation and dissociation protocol. Subsequently, a 416  
multi-reference classifier was trained using the function *trainSingleR* with default parameters 417

of the R package SingleR version 1.8.1 [21]. After this processing, we could use the data 418  
to classify our log-normalized data using the *classifySingleR* function without fine-tuning 419  
(*fine.tune* = F). Hereby, each cell is compared to all seven references and the label from 420  
the highest-scoring reference is assigned. Some cell type labels were merged into broader 421  
categories after classification: cells annotated as "CD\_IC", "CD\_IC\_A" or "CD\_IC\_B" were 422  
reabeled as "CD\_IC", cells annotated as "T", "NK", "B" or "MPH" were reabeled as 423  
"Immune". Cells that were unassigned after pruning of assignments based on classification 424  
scores were removed for subsequent analyses. 425

## Demultiplexing of mouse strains 426

A list of genetic variants between mouse strains was downloaded in VCF format from 427  
the Mouse Genomes Project [13], accessed on 21 October 2020. This reference VCF file 428  
was filtered for samples CAST\_EiJ, C57BL\_6NJ and 129S1\_SvImJ and chromosomes 1-19. 429  
Genotyping of single barcodes was performed with *cellsnp-lite* [26], filtering for positions in 430  
the reference VCF with a coverage of at least 20 UMIs and a minor allele frequency of at 431  
least 0.1 in the data (*-minCOUNT* 20, *-minMAF* 0.1). *Vireo* [22] was used to demultiplex 432  
and label cells based on their genotypes. Only cells that could unambiguously assigned to 433  
CAST\_EiJ (CAST), C57BL\_6NJ (BL6) or 129S1\_SvImJ (SvImJ) were kept, cells labeled as 434  
doublet or unassigned were removed. 435

## Genotype-based estimation of background noise 436

Based on the coverage filtered VCF-file (see above), we identified homozygous SNPs that 437  
distinguish the three strains and removed SNPs that had predominantly coverage in only 438  
one of the strains (1st percentile of allele frequency). 439

In most parts of the analysis, we focused on the comparison between the mouse subspecies, 440  
*M.m.domesticus* and *M.m.castaneus*. To this end, we subseted reads (UMI-counts) that 441



overlap with SNPs that distinguish the two mouse subspecies. 442

To estimate background noise levels based on allele counts of genetic variants, an approach 443 described in Heaton et al.[15] was adapted to estimate the total amount of background 444 noise for each cells. First, the abundance of endogenous and foreign allele counts (i.e. cross- 445 genotype background noise) was quantified per cell. Because of the filter for homozygous 446 variants, there are two possible genotypes for each locus, denoted as 0 for the endogenous 447 allele, i.e. the expected allele based on the strain assignment of the cell, and 1 for the foreign 448 allele. The probability for observable background noise at each locus  $l$  in cell  $c$  is given by 449

$$p = \rho_c * \frac{A_{l,1}}{A_{l,0} + A_{l,1}} \quad (1)$$

where  $\rho_c$  is the total background noise fraction in a cell and the experiment wide (over cells 450 and empty droplets) foreign allele fraction is calculated from the foreign allele counts  $A_{l,1}$  451 and the endogenous allele counts  $A_{l,0}$ . The foreign allele fraction is then used to account for 452 intra-genotype background noise (contamination within endogenous allele counts). 453

The observed allele counts  $A_c$  per cell are modeled as draws from a binomial distribution 454 with the likelihood function: 455

$$P(A_c|\rho_c) = \prod_{l \in L} \binom{A_{l,c,0} + A_{l,c,1}}{A_{l,c,1}} p^{A_{l,c,1}} (1 - p)^{A_{l,c,0}} \quad (2)$$

A maximum likelihood estimate of  $\rho_c$  was obtained using one dimensional optimization in 456 the interval  $[0,1]$ . 457

The 95% confidence interval of each  $\rho_c$  estimate was calculated as the profile likelihood 458 using the function *uniroot* of the R package stats [27]. 459

## Comparison of endogenous, contamination and empty droplet profiles 460

Empty droplets were defined based on the UMI curve of the barcodes ranked by UMI counts, 461  
thus selecting barcodes from a plateau with  $\sim 500 - 1000$  UMIs (Supplementary Figure 462  
S4). For the following analysis, the presence of *M.m.domesticus* alleles in *M.m.domesticus* 463  
cells (i.e., endogenous), in *M.m.castaneus* cells (i.e., contamination) and empty droplets was 464  
compared. After this filtering, we summarized counts per gene and across barcodes of the 465  
same category to generate pseudobulk profiles. 466

In order to estimate cell type composition in the empty and contamination profiles, we 467  
used the deconvolution method implemented in SCDC[16], the endogenous single cell allele 468  
counts from the respective replicate were used as reference ( $q_{threshold}=0.6$ ). In addition, 469  
cell type filtering (frequency $>0.75\%$ ) was applied. Endogenous, contamination and empty 470  
pseudobulk profiles from each replicate were deconvoluted using their respective single cell / 471  
single nucleus reference. 472

To compare the correlation between the different profiles, pseudobulk counts were downsam- 473  
pled to the same total size. 474

## Evaluation of marker gene expression 475

A list of marker genes for Proximal tubule cells (PT), Principal cells (CD\_PC), Intercalated 476  
cells (CD\_IC) and Endothelial cells (Endo) was downloaded from the public database 477  
PanglaoDB [17], accessed on 13 May 2022. Log2 fold changes contrasting PT cells against all 478  
other cells were calculated with Seurat using the function *FindMarkers* after normalization 479  
with *NormalizeData*. The expression fraction  $e$  of PT markers was calculated as the fraction of 480  
cells for which at least 1 count of that gene was detected. To contrast expression fraction in PT 481  
cells against non-PT, the negative log-ratio was calculated as  $-\log((e_{PT} + 1)/(e_{non-PT} + 1))$ . 482

## Computational background noise estimation and correction methods 483

**CellBender** [4] makes use of a deep generative model to include various potential sources 484  
of background noise. Cell states are encoded in a lower-dimensional space and an integer 485  
matrix of noise counts is inferred, which is subsequently subtracted from the input count 486  
matrix to generate a corrected matrix. 487

The *remove-background* module of CellBender v0.2.0 was run on the raw feature barcode 488  
matrix as input, with a default *fpr* value of 0.01. For the comparison of different parameter 489  
settings, *fpr* values of 0.05 and 0.1 were also included in the analysis. For the parameter 490  
*expected-cells* the number of cells after cell calling and filtering in each replicate was provided. 491  
The parameter *total-droplets-included* was set to 25000. 492

**SoupX**[11] estimates the experiment-wide amount of background noise based on the 494  
expression of strong marker genes that are expected to be expressed exclusively in one cell 495  
type. These genes can either be provided by the user or identified from the data. A profile 496  
of background noise is inferred from empty droplets. This profile is subsequently removed 497  
from each cell after aggregation into clusters to generate a corrected count matrix. 498

Cluster labels for SoupX were generated by Louvain clustering on 30 principal components 499  
and a resolution of 1 as implemented by *FindClusters* in Seurat after normalization and 500  
feature selection of 5000 genes. Providing the CellRanger output and cluster labels as input, 501  
data were imported into SoupX version 1.6.1 and the background noise profile was inferred 502  
with *load10X*. The contamination fraction was estimated using *autoEstCont* and background 503  
noise was removed using *adjustCounts* with default parameters. 504

For the comparison of parameter settings, different resolution values (0.5,1,2) for Lou- 505  
vain clustering were tested, alongside with manually specifying the contamination fraction 506  
(0.1,0.2). 507

508

**DecontX**[8] is a Bayesian method that estimates and removes background noise by 509  
modeling the expression in each cell as a mixture of multinomial distributions, one native 510  
distribution cell’s population and one contamination distribution from all other cell popu- 511  
lations. The main inputs are a filtered count matrix only containing barcodes that were 512  
called as cells and a vector of cluster labels. The contamination distribution is inferred as 513  
a weighted combination of multiple cell populations. Alternatively, it is also possible to 514  
obtain an empirical estimation of the contamination distribution from empty droplets in 515  
cases where the background noise is expected to differ from the profile of filtered cells. 516

The function *decontX* from the R package *celda* version 1.12.0 was run on the fil- 517  
tered, unnormalized count matrix and clusters were inferred with the implemented default 518  
method based on UMAP dimensionality reduction and dbSCAN [28] clustering. For the 519  
”DecontX\_default” results the parameter ’background’ was set to NULL, i.e. estimating 520  
background noise based on cell populations in the filtered data only. ”DecontX\_background” 521  
results were obtained by providing an unfiltered count matrix including all detected barcodes 522  
as ’background’ to empirically estimate the contamination distribution. Besides the default 523  
clustering method implemented in DecontX, cluster labels obtained from Lovain clustering 524  
(resolution 0.5,1 and 2) were also provided to test different parameter settings. 525

## Evaluation metrics 526

### Estimation accuracy 527

The genotype-based estimates  $\rho_c$  for *M.m.castaneus* cells served as ground truth to evaluate 528  
the estimation accuracy of different methods. For each method cell-wise background noise 529  
fractions  $a_c$  were calculated from the corrected count matrix  $X$  and the uncorrected (”raw”) 530  
count matrix  $R$  as 531

$$a_c = 1 - \frac{\sum_g x_{c,g}}{\sum_g r_{c,g}} \quad (3)$$

for cells  $c$  and genes  $g$ . 532

533

**RMSLE** The Root Mean Squared Logarithmic Error (RMSLE) is a lower bound metric 534  
that we use to quantify the difference between estimated background noise fractions per cell 535  
 $a_c$  from different computational background correction methods and the genotype-based 536  
estimates  $\rho_c$ , obtained from genotype based estimation. It is calculated as: 537

$$RMSLE = \sqrt{\frac{1}{n} \sum_{c=1}^n (\log(a_c + 1) - \log(\rho_c + 1))^2} \quad (4)$$

538

539

**Kendall's  $\tau$**  To evaluate how well cell-to-cell variation of the background noise fraction 540  
is captured by the estimated values  $a_c$ , the Kendall rank correlation coefficient  $\tau$  to the 541  
genotype-based estimates  $\rho_c$  was computed using the implementation in the R package stats 542  
[27] as  $\tau = cor(a_c, \rho_c, method = "kendall")$ . 543

## Marker gene detection 544

The same set of 10 PT marker genes from PanglaoDB as in section Evaluation of marker 545  
gene expression was used to evaluate the improvement on marker gene detection on corrected 546  
count matrices. 547

548

**Log2 fold change** for each gene between the average expression in PT cells and average 549  
expression in other cells were obtained using the *NormalizeData* and *FindMarkers* functions 550  
in Seurat version 4.1.1. 551

552

**Expression fraction** Entries in each corrected count matrix were first rounded to the 553  
nearest integer. The expression fraction of each gene in a cell population was calculated as 554

the fraction of cells for which at least 1 count of that gene was detected. For evaluation of  
PT marker genes, unspecific detection is defined as the expression fraction in non-PT cells.

## Cell type identification

**Prediction score** Each corrected count matrix was log-normalized and reference-based  
classification in SingleR [21] was performed with a pre-trained model (see section Processing  
and annotation of scRNA-seq and snRNA-seq data) on data from Denisenko et al. [14].  
SingleR provides *delta* values as a measure for classification confidence, which depicts the  
difference of the assignment score for the assigned label and the median score across all  
labels. The *delta* values for each cell were retrieved using the function *getDeltaFromMedian*  
relative to the cells highest-scoring reference. A prediction score per cell type was calculated  
by averaging *delta* values across individual cells and a global prediction score per replicate  
was calculated by averaging across cell type prediction scores.

**Average silhouette** The silhouette width is an internal cluster evaluation metric to  
contrast similarity within a cluster with similarity to the nearest cluster. The cell type  
annotations from reference-based classification were used as cluster labels here. Count  
matrices were filtered to select for *M.m.castaneus* cells and cell types with more than 10  
cells. Distance matrices were computed on the first 30 principal components using euclidean  
distance as distance measure. Using the cell type labels and distance matrix as input, the  
average silhouette width per cell type was computed with the R package cluster version  
2.1.4. An *Average silhouette* per replicate was calculated as the mean of cell type silhouette  
widths.

**Purity** is an external cluster evaluation metric to evaluate how well a clustering recovers

known classes. Here, *Purity* was used to assess to what extent unsupervised cluster labels 580  
correspond to cell types. Count matrices were filtered to select for *M.m.castaneus* cells and 581  
cell types with more than 10 cells and louvain clustering as implemented in *FindClusters* of 582  
Seurat version 4.1.1 on the first 30 principal components and with a resolution parameter of 583  
1 was used get a cluster label for each cell. Providing cell type annotations as true labels 584  
alongside the cluster labels, *Purity* was computed with the R package ClusterR version 1.2.6 585  
[29]. 586

***k*-NN overlap** To evaluate the lower-dimensional structure in the data beyond clusters 588  
and cell-types *k*-NN overlap was used as described in Ahlmann-Eltze and Huber [30]. A 589  
ground truth reference *k*-NN graph was constructed on a 'genotype-cleaned' count matrix, 590  
only counting molecules that carry a subspecies-endogenous allele. Raw and corrected count 591  
matrices were filtered to contain the same genes as in the reference and a query *k*-NN graph 592  
was computed on the first 30 principal components. The *k*-NN overlap summarizes the 593  
overlap of the 50 nearest neighbors of each cell in the query with the reference *k*-NN graph. 594

## Abbreviations 595

CAST Mus musculus castaneus

*k*-NN *k* nearest neighbor

snRNA-seq single nucleus RNA-sequencing

PT proximal tubular cells/markers

scRNA-seq single cell RNA-sequencing 596

SNP single nucleotide polymorphism

UMI unique molecular identifier

UMAP Uniform Manifold Approximation and Projection

VCF Variant Call Format

|                                                                                                                                                            |     |
|------------------------------------------------------------------------------------------------------------------------------------------------------------|-----|
| <b>1 Declarations</b>                                                                                                                                      | 597 |
| <b>Ethics approval and consent to participate</b>                                                                                                          | 598 |
| All procedures performed are IACUC approved on Broad Institute animal protocol #                                                                           | 599 |
| 0061-07-15-1.                                                                                                                                              | 600 |
| <b>Consent for publication</b>                                                                                                                             | 601 |
| Not applicable.                                                                                                                                            | 602 |
| <b>Availability of data and materials</b>                                                                                                                  | 603 |
| The code used to analyse the data and benchmark the background methods is available                                                                        | 604 |
| on github <a href="https://github.com/Hellmann-Lab/scRNA-seq_Contamination">https://github.com/Hellmann-Lab/scRNA-seq_Contamination</a> , larger files are | 605 |
| deposited in the linked zenodo account. All sequencing files were deposited in GEO                                                                         | 606 |
| SRPXXXX.                                                                                                                                                   | 607 |
| <b>Competing Interests</b>                                                                                                                                 | 608 |
| The authors declare that they have no competing interests.                                                                                                 | 609 |
| <b>Funding</b>                                                                                                                                             | 610 |
| This work was supported and inspired by the CZI Standards and Technology Working Group                                                                     | 611 |
| and the Deutsche Forschungsgemeinschaft (DFG): BV HE7669/1-2 and PJ EN1093/5-1.                                                                            | 612 |
| <b>Author's contributions</b>                                                                                                                              | 613 |
| IH, WE and PJ conceptualized this study. IH and PJ wrote the original draft. PJ, BV and                                                                    | 614 |
| ZK conducted the formal analysis. SS did the data curation. XA, JM and CM performed                                                                        | 615 |
| the experiments. JL supervised the experiments. WE, HH, and JL acquired funding. All                                                                       | 616 |
| authors reviewed and edited the manuscript. (using <a href="https://credit.niso.org/">https://credit.niso.org/</a> )                                       | 617 |



## Acknowledgements 618

We thank Gabriela Stumberger for her help in benchmarking and Batuhan Akçaboza for 619  
his contribution to calculating genotype estimates. We thank the Broad Genomics Platform 620  
for sequencing. 621

## References 622

- [1] Parekh, S., Ziegenhain, C., Vieth, B., Enard, W., Hellmann, I.: The impact of amplifi- 623  
cation on differential expression analyses by RNA-seq. *Sci. Rep.* **6**, 25533 (2016) 624
  
- [2] Ziegenhain, C., Vieth, B., Parekh, S., Reinius, B., Guillaumet-Adkins, A., Smets, M., 625  
Leonhardt, H., Heyn, H., Hellmann, I., Enard, W.: Comparative analysis of Single-Cell 626  
RNA sequencing methods. *Mol. Cell* **65**(4), 631–6434 (2017) 627
  
- [3] Zheng, G.X.Y., Terry, J.M., Belgrader, P., Ryvkin, P., Bent, Z.W., Wilson, R., Ziraldo, 628  
S.B., Wheeler, T.D., McDermott, G.P., Zhu, J., Gregory, M.T., Shuga, J., Montesclaros, 629  
L., Underwood, J.G., Masquelier, D.A., Nishimura, S.Y., Schnall-Levin, M., Wyatt, 630  
P.W., Hindson, C.M., Bharadwaj, R., Wong, A., Ness, K.D., Beppu, L.W., Deeg, H.J., 631  
McFarland, C., Loeb, K.R., Valente, W.J., Ericson, N.G., Stevens, E.A., Radich, J.P., 632  
Mikkelsen, T.S., Hindson, B.J., Bielas, J.H.: Massively parallel digital transcriptional 633  
profiling of single cells. *Nat. Commun.* **8**, 14049 (2017) 634
  
- [4] Fleming, S.J., Marioni, J.C., Babadi, M.: CellBender remove-background: a deep 635  
generative model for unsupervised removal of background noise from scRNA-seq datasets. 636  
*bioRxiv*, 791699 (2019) 637
  
- [5] Lun, A.T.L., Riesenfeld, S., Andrews, T., Dao, T.P., Gomes, T., participants in the 638  
1st Human Cell Atlas Jamboree, Marioni, J.C.: EmptyDrops: distinguishing cells from 639

- empty droplets in droplet-based single-cell RNA sequencing data. *Genome Biol.* **20**(1), 640  
63 (2019) 641
- [6] Pääbo, S., Irwin, D.M., Wilson, A.C.: DNA damage promotes jumping between 642  
templates during enzymatic amplification. *J. Biol. Chem.* **265**(8), 4718–4721 (1990) 643
- [7] Dixit, A.: Correcting chimeric crosstalk in single cell RNA-seq experiments. *bioRxiv*, 644  
093237 (2021) 645
- [8] Yang, S., Corbett, S.E., Koga, Y., Wang, Z., Johnson, W.E., Yajima, M., Campbell, 646  
J.D.: Decontamination of ambient RNA in single-cell RNA-seq with DecontX. *Genome* 647  
*Biol.* **21**(1), 57 (2020) 648
- [9] Griffiths, J.A., Richard, A.C., Bach, K., Lun, A.T.L., Marioni, J.C.: Detection and 649  
removal of barcode swapping in single-cell RNA-seq data. *Nat. Commun.* **9**(1), 2667 650  
(2018) 651
- [10] Caglayan, E., Liu, Y., Konopka, G.: Neuronal ambient RNA contamination causes 652  
misinterpreted and masked cell types in brain single-nuclei datasets. *Neuron* (2022) 653
- [11] Young, M.D., Behjati, S.: SoupX removes ambient RNA contamination from droplet- 654  
based single-cell RNA sequencing data. *Gigascience* **9**(12) (2020) 655
- [12] Ding, J., Adiconis, X., Simmons, S.K., Kowalczyk, M.S., Hession, C.C., Marjanovic, 656  
N.D., Hughes, T.K., Wadsworth, M.H., Burks, T., Nguyen, L.T., Kwon, J.Y.H., Barak, 657  
B., Ge, W., Kedaigle, A.J., Carroll, S., Li, S., Hacohen, N., Rozenblatt-Rosen, O., 658  
Shalek, A.K., Villani, A.-C., Regev, A., Levin, J.Z.: Systematic comparison of single-cell 659  
and single-nucleus RNA-sequencing methods. *Nat. Biotechnol.* **38**(6), 737–746 (2020) 660
- [13] Keane, T.M., Goodstadt, L., Danecek, P., White, M.A., Wong, K., Yalcin, B., Heger, 661  
A., Agam, A., Slater, G., Goodson, M., Furlotte, N.A., Eskin, E., Nellåker, C., Whitley, 662  
H., Cleak, J., Janowitz, D., Hernandez-Pliego, P., Edwards, A., Belgard, T.G., Oliver, 663

- P.L., McIntyre, R.E., Bhomra, A., Nicod, J., Gan, X., Yuan, W., van der Weyden, L., 664  
Steward, C.A., Bala, S., Stalker, J., Mott, R., Durbin, R., Jackson, I.J., Czechanski, 665  
A., Guerra-Assunção, J.A., Donahue, L.R., Reinholdt, L.G., Payseur, B.A., Ponting, 666  
C.P., Birney, E., Flint, J., Adams, D.J.: Mouse genomic variation and its effect on 667  
phenotypes and gene regulation. *Nature* **477**(7364), 289–294 (2011) 668
- [14] Denisenko, E., Guo, B.B., Jones, M., Hou, R., de Kock, L., Lassmann, T., Poppe, D., 669  
Clément, O., Simmons, R.K., Lister, R., Forrest, A.R.R.: Systematic assessment of 670  
tissue dissociation and storage biases in single-cell and single-nucleus RNA-seq workflows. 671  
*Genome Biol.* **21**(1), 130 (2020) 672
- [15] Heaton, H., Talman, A.M., Knights, A., Imaz, M., Gaffney, D.J., Durbin, R., Hemberg, 673  
M., Lawnczak, M.K.N.: Souporecell: robust clustering of single-cell RNA-seq data by 674  
genotype without reference genotypes. *Nat. Methods* **17**(6), 615–620 (2020) 675
- [16] Dong, M., Thennavan, A., Urrutia, E., Li, Y., Perou, C.M., Zou, F., Jiang, Y.: SCDC: 676  
bulk gene expression deconvolution by multiple single-cell RNA sequencing references. 677  
*Brief. Bioinform.* **22**(1), 416–427 (2021) 678
- [17] Franzén, O., Gan, L.-M., Björkegren, J.L.M.: PanglaoDB: a web server for exploration 679  
of mouse and human single-cell RNA sequencing data. *Database* **2019** (2019) 680
- [18] Biber, J., Hernando, N., Forster, I., Murer, H.: Regulation of phosphate transport in 681  
proximal tubules. *Pflugers Arch.* **458**(1), 39–52 (2009) 682
- [19] Custer, M., Lötscher, M., Biber, J., Murer, H., Kaissling, B.: Expression of Na-P(i) 683  
cotransport in rat kidney: localization by RT-PCR and immunohistochemistry. *Am. J.* 684  
*Physiol.* **266**(5 Pt 2), 767–74 (1994) 685
- [20] Hao, Y., Hao, S., Andersen-Nissen, E., Mauck, W.M. 3rd, Zheng, S., Butler, A., Lee, 686  
M.J., Wilk, A.J., Darby, C., Zager, M., Hoffman, P., Stoeckius, M., Papalexi, E., 687

- Mimitou, E.P., Jain, J., Srivastava, A., Stuart, T., Fleming, L.M., Yeung, B., Rogers, 688  
A.J., McElrath, J.M., Blish, C.A., Gottardo, R., Smibert, P., Satija, R.: Integrated 689  
analysis of multimodal single-cell data. *Cell* **184**(13), 3573–358729 (2021) 690
- [21] Aran, D., Looney, A.P., Liu, L., Wu, E., Fong, V., Hsu, A., Chak, S., Naikawadi, R.P., 691  
Wolters, P.J., Abate, A.R., Butte, A.J., Bhattacharya, M.: Reference-based analysis of 692  
lung single-cell sequencing reveals a transitional profibrotic macrophage. *Nat. Immunol.* 693  
**20**(2), 163–172 (2019) 694
- [22] Huang, Y., McCarthy, D.J., Stegle, O.: Vireo: Bayesian demultiplexing of pooled 695  
single-cell RNA-seq data without genotype reference. *Genome Biol.* **20**(1), 273 (2019) 696
- [23] Clark, J.Z., Chen, L., Chou, C.-L., Jung, H.J., Lee, J.W., Knepper, M.A.: Representa- 697  
tion and relative abundance of cell-type selective markers in whole-kidney RNA-Seq 698  
data. *Kidney Int.* **95**(4), 787–796 (2019) 699
- [24] Vernon, K.A., Zhou, Y., Xiao, L., Zhang, F., Greka, A.: Single-cell dissociation from 700  
human kidney (nephrectomy tissue) for scRNA-seq. [https://www.protocols.io/view/](https://www.protocols.io/view/single-cell-dissociation-from-human-kidney-nephrec-6j9hcr6) 701  
[single-cell-dissociation-from-human-kidney-nephrec-6j9hcr6](https://www.protocols.io/view/single-cell-dissociation-from-human-kidney-nephrec-6j9hcr6) 702
- [25] Drokhlyansky, E., Van, N., Slyper, M., Waldman, J., Segerstolpe, A., Rozenblatt-Rosen, 703  
O., Regev, A.: HTAPP\_TST- Nuclei isolation from frozen tissue v2. ZappyLab, Inc. 704  
Title of the publication associated with this dataset: protocols.io (2020) 705
- [26] Huang, X., Huang, Y.: Cellsnr-lite: an efficient tool for genotyping single cells. *Bioin-* 706  
*formatics* (2021) 707
- [27] Team, R.C.: R: A language and environment for statistical computing. R foundation 708  
for statistical computing, vienna, austria. [http://www. R-project. org/](http://www.R-project.org/) (2013) 709
- [28] Hahsler, M., Piekenbrock, M., Doran, D.: dbscan: Fast density-based clustering with R. 710  
*J. Stat. Softw.* **91**, 1–30 (2019) 711

- [29] Mouselimis, L.: Gaussian mixture models, K-means, mini-batch-kmeans, K-medoids 712  
and affinity propagation clustering [R package ClusterR version 1.2.7]. Comprehensive 713  
R Archive Network (CRAN) (2022) 714
- [30] Ahlmann-Eltze, C., Huber, W.: Transformation and preprocessing of Single-Cell RNA- 715  
Seq data. bioRxiv, 2021–0624449781 (2021) 716

## Supplementary Information

717

### The effect of background noise and its removal on the analysis of single-cell expression data

718

719

720

Philipp Janssen<sup>1</sup> Zane Kliesmete<sup>1</sup>, Beate Vieth<sup>1</sup>, Xian Adiconis<sup>2,3</sup>, Sean Simmons<sup>2,3</sup>, Jamie

721

Marshall<sup>4</sup>, Cristin McCabe<sup>2</sup>, Holger Heyn<sup>5</sup>, Joshua Z. Levin<sup>2,3</sup>, Wolfgang Enard<sup>1</sup>, Ines

722

Hellmann<sup>1,\*</sup>,

723

<sup>1</sup> Anthropology and Human Genomics, Department of Biology II, Ludwig-Maximilians Universitaet, Munich,

724

Germany

725

<sup>2</sup> Klarman Cell Observatory, Broad Institute of Harvard and MIT, Cambridge, MA USA

726

<sup>3</sup> Stanley Center for Psychiatric Research, Broad Institute of Harvard and MIT, Cambridge, MA USA

727

<sup>4</sup> Broad Institute of Harvard and MIT, Cambridge, MA USA

728

<sup>5</sup> CNAG-CRG, Centre for Genomic Regulation, Barcelona Institute of Science and Technology, Barcelona,

729

Spain

730

\* correspondence [hellmann@bio.lmu.de](mailto:hellmann@bio.lmu.de)

731

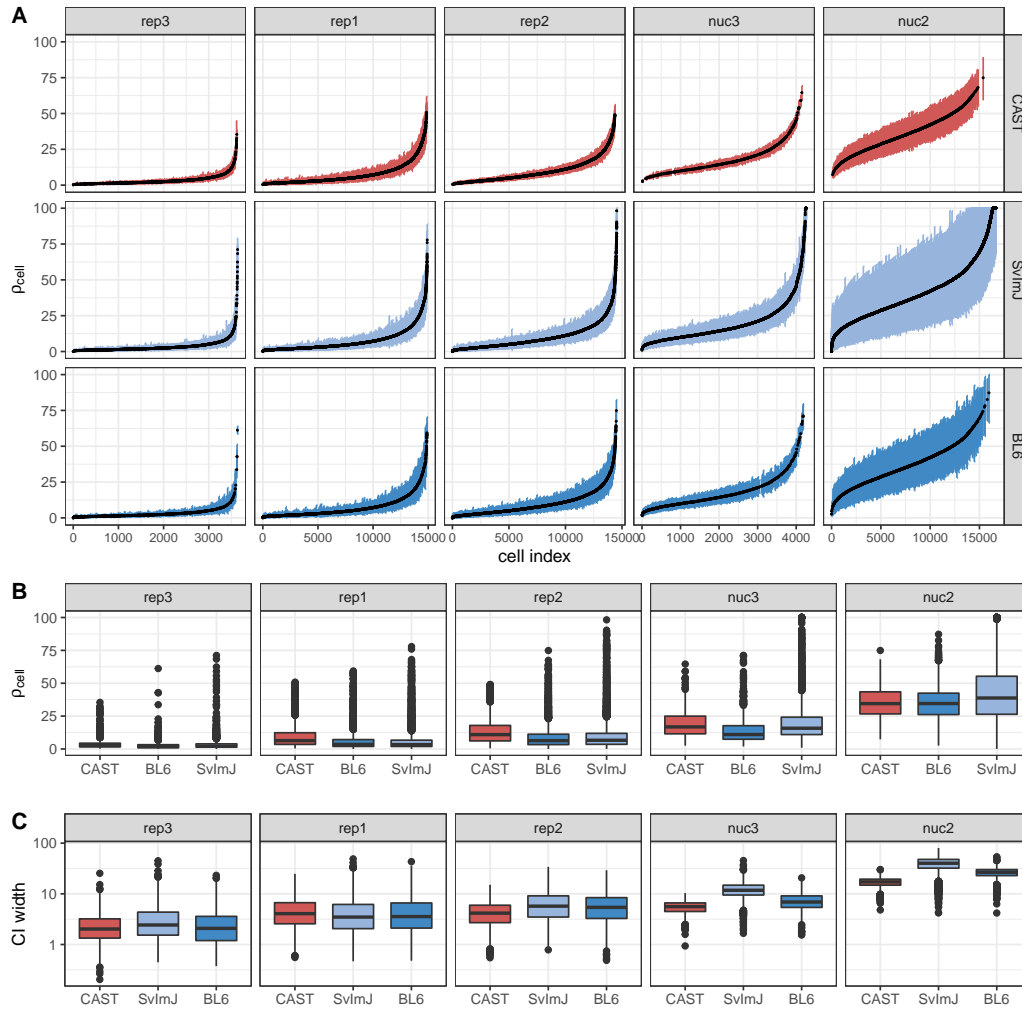

**Supplementary Figure S1. Estimation of background noise levels.** A) Estimates of background noise ( $\rho_{cell}$ ) per cell. Cells were ordered by ascending  $\rho_{cell}$  in each replicate. Colored bars indicate 95% confidence intervals calculated by profile likelihood. B) Summary of  $\rho_{cell}$  estimates per strain. C) Width of confidence intervals for  $\rho_{cell}$ .

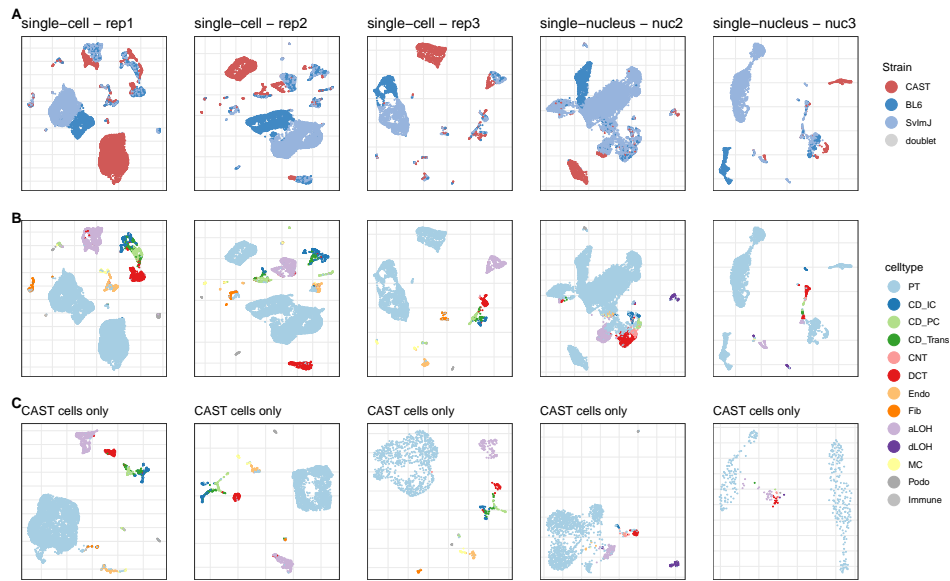

**Supplementary Figure S2. UMAP visualization showing the composition per replicate** of A) all cells, colored by strain assignment, B) all cells, colored by cell type assignment and C) *M. m. castaneus* cells only, colored by cell type assignment.

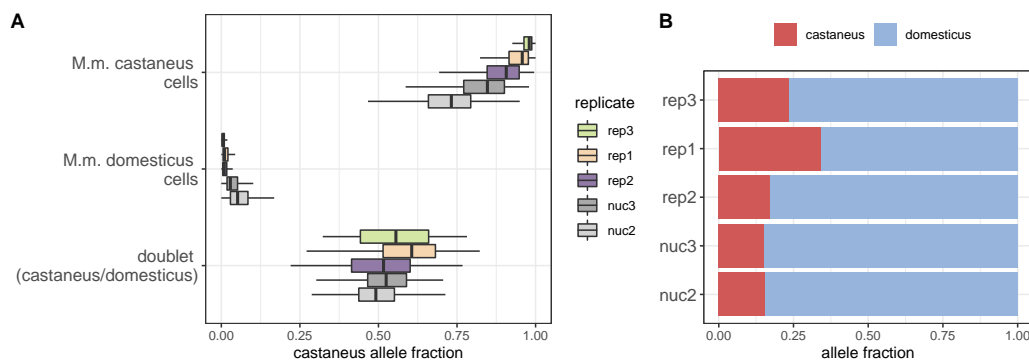

**Supplementary Figure S3. Detection of cross-genotype contamination** A) *M.m. castaneus* allele frequency per cell in cells from different subspecies and mixed-subspecies doublets. In all replicates varying amounts of *M.m. castaneus* alleles are detected in *M.m. domesticus* cells and vice versa, pointing towards background noise originating from cross-genotype contamination. B) Allele frequency proportions across all cells in a replicate.



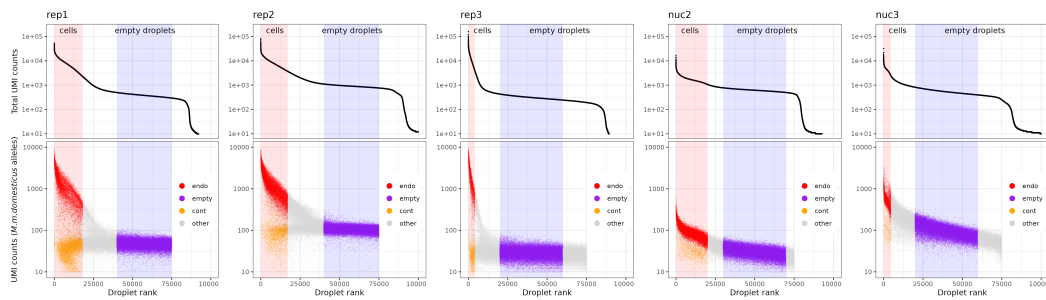

**Supplementary Figure S4. Definition of endogenous, empty droplet and contamination profiles across replicates.** Droplet barcodes were ordered by their total UMI counts and empty droplets were defined from this UMI curve as barcodes in the low UMI count plateau area (upper panel). UMI counts of reads covering *M. m. domesticus* specific alleles were used to construct three different profiles (lower panel). *M. m. domesticus* allele counts in *M. m. domesticus* cells were defined as endogenous counts (endo), *M. m. domesticus* allele counts in *M. m. castaneus* cells as contaminating counts (cont) and *M. m. domesticus* allele counts associated with barcodes of the empty droplet plateau as empty droplet counts (empty).

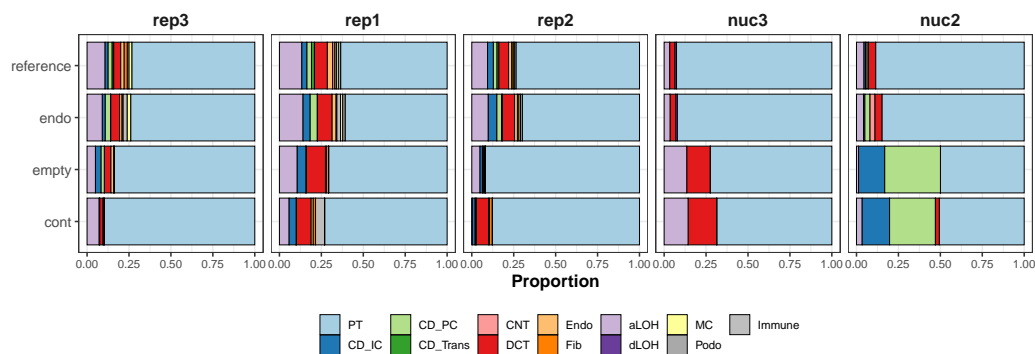

**Supplementary Figure S5. Dissection of cell type contributions by deconvolution of pseudobulk profiles.** The stacked bar plots of 'reference' depict the proportions of cell types in a single cell reference used for deconvolution with SCDC [16]. The 'endo', 'empty' and 'cont' bar plots show the estimated fraction of cell types after deconvolution of pseudobulk profiles that were aggregated for each category.

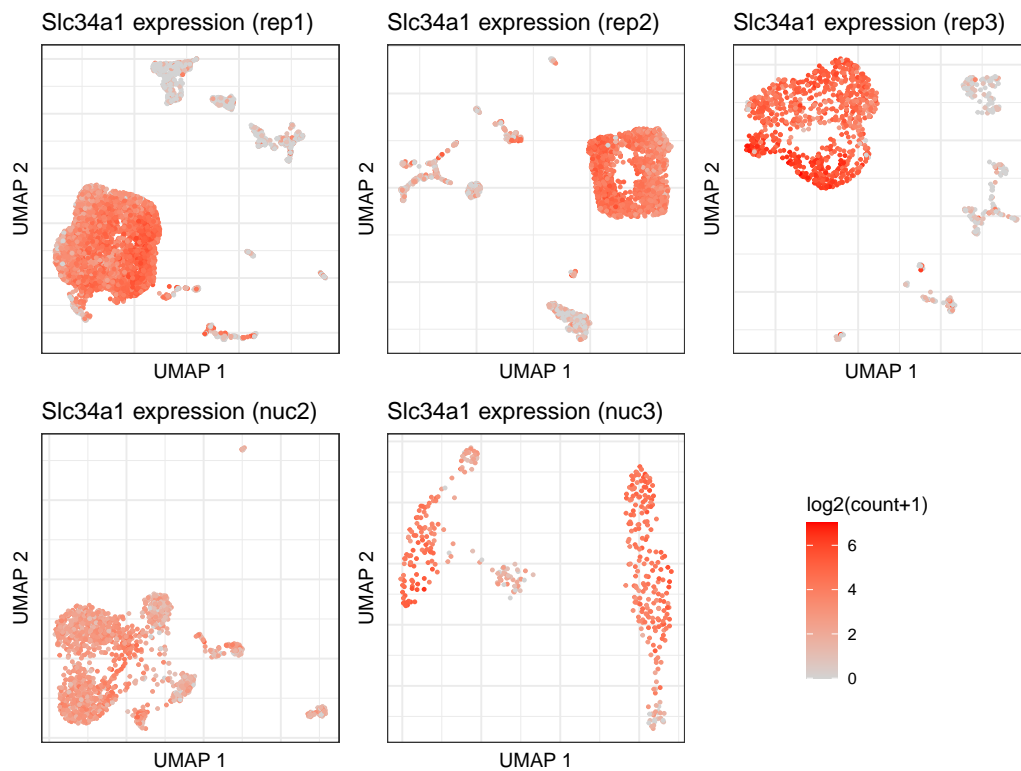

**Supplementary Figure S6. Slc34a1 expression across replicates.** UMAP representation *M. m. castaneus* cells coloured by Slc34a1 expression. Spurious detection of Slc34a1 in all cell clusters is observed in all replicates. In the replicates with the lowest background noise levels (rep1,rep3), Slc34a1 expression is most concentrated in PT cells.

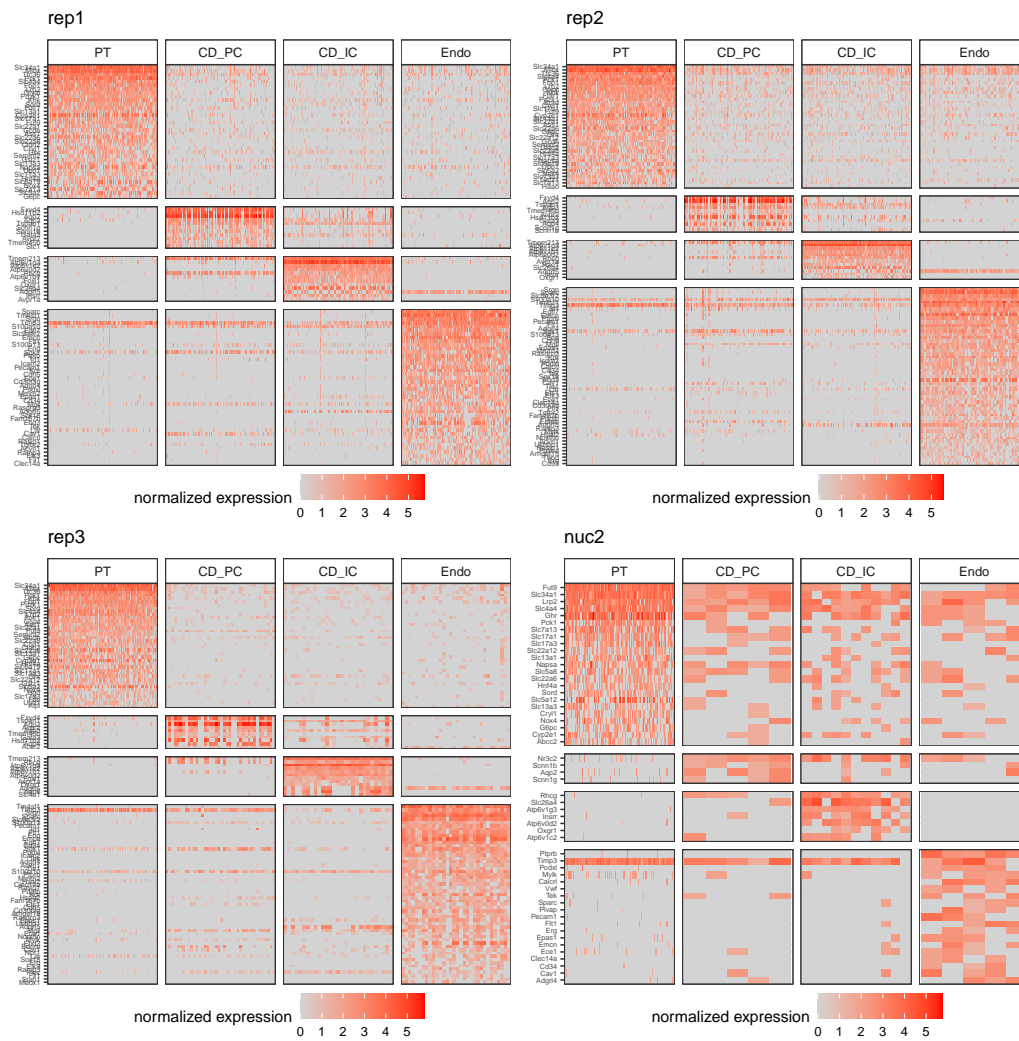

**Supplementary Figure S7. Expression of cell type marker genes.** Heatmaps show the normalized expression of known marker genes for four selected cell types across replicates. Marker genes were obtained from the PanlaoDB database [17] and filtered to select for genes that are detected in at least 50% of the cells of the cell type in which they are expected to be expressed. The replicate nuc3 was excluded from this figure due to an insufficient number of collecting duct and endothelial cells. PT: proximal tubule; CD\_IC: intercalated cells of collecting duct; CD\_PC: principal cells of collecting duct; Endo: endothelial

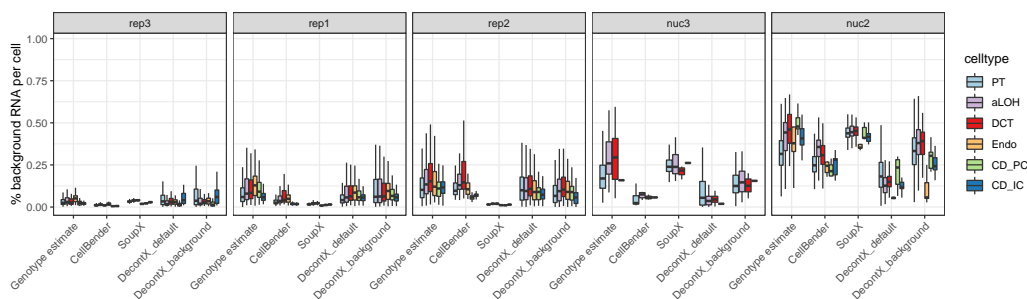

**Supplementary Figure S8. Estimated background noise levels across cell types.** Genotype estimates are inferred based on genetic variants. Cellbender, SoupX and DecontX estimates are calculated for each cell based on a corrected count matrix. PT: proximal tubule; aLOH: ascending loop of Henle; DCT: distal convoluted tubule; Endo: endothelial; CD\_PC: principal cells of collecting duct; CD\_IC: intercalated cells of collecting duct.

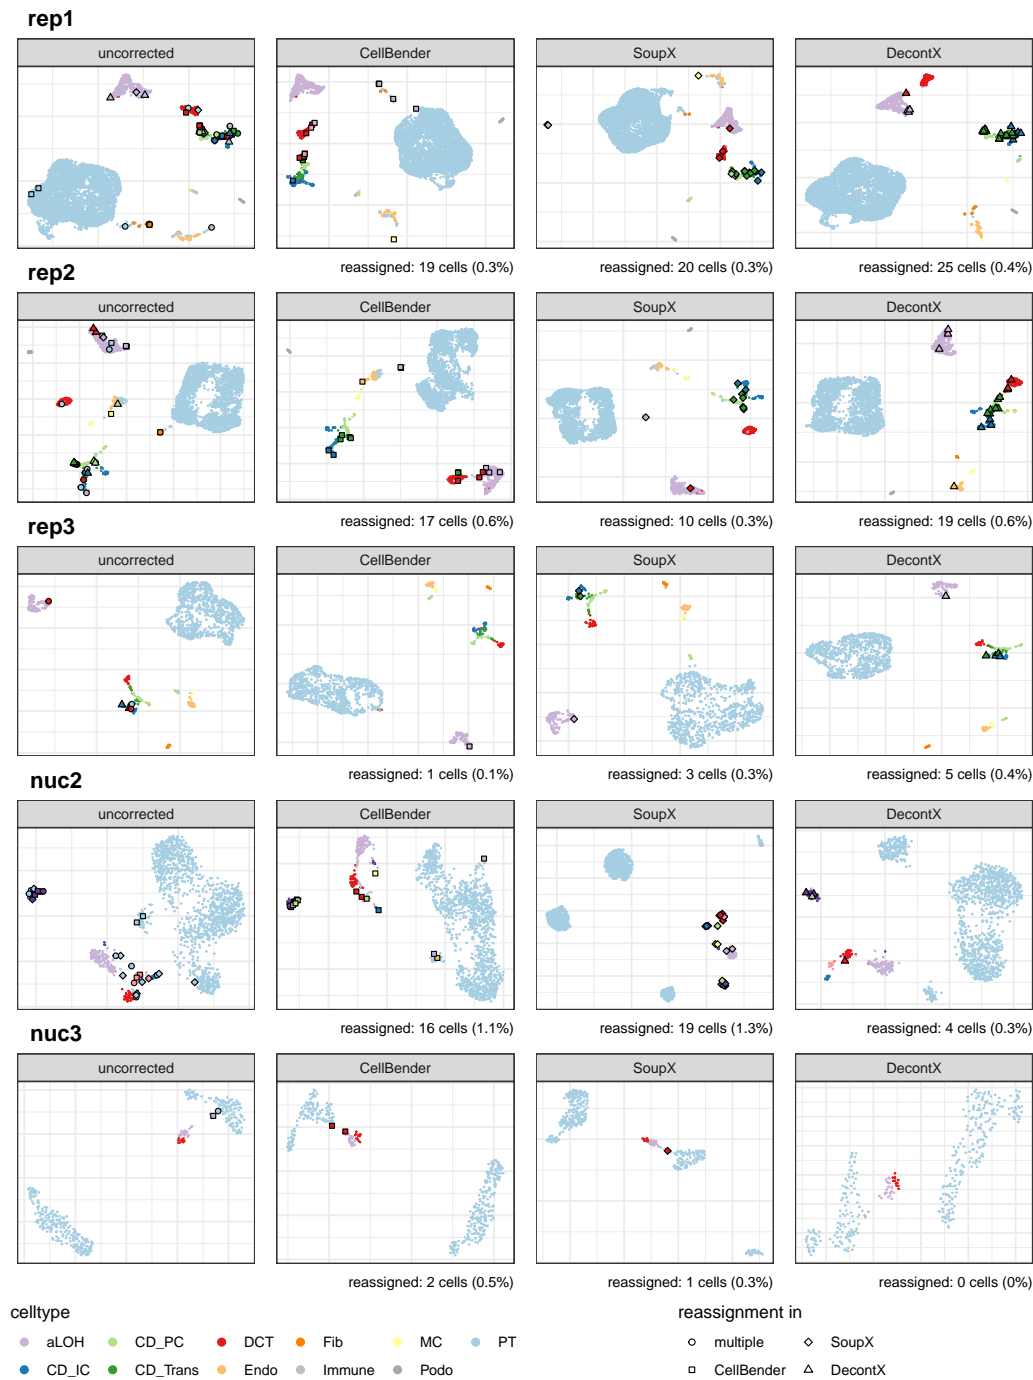

**Supplementary Figure S9. UMAP representations of all replicates before and after background noise correction.** Cells are colored by cell type labels obtained from reference based classification. Individual cells that received a new label after correction are highlighted. In case of the uncorrected data, all cells that received a new label after correction with any of the methods are highlighted. PT: proximal tubule; CD\_IC: intercalated cells of collecting duct; CD\_PC: principal cells of collecting duct; CD\_Trans: transitional cells of collecting duct; CNT: connecting tubule; DCT: distal convoluted tubule; Endo: endothelial; Fib: fibroblasts; aLOH: ascending loop of Henle; dLOH: descending loop of Henle; MC: mesangial cells; Podo: podocytes

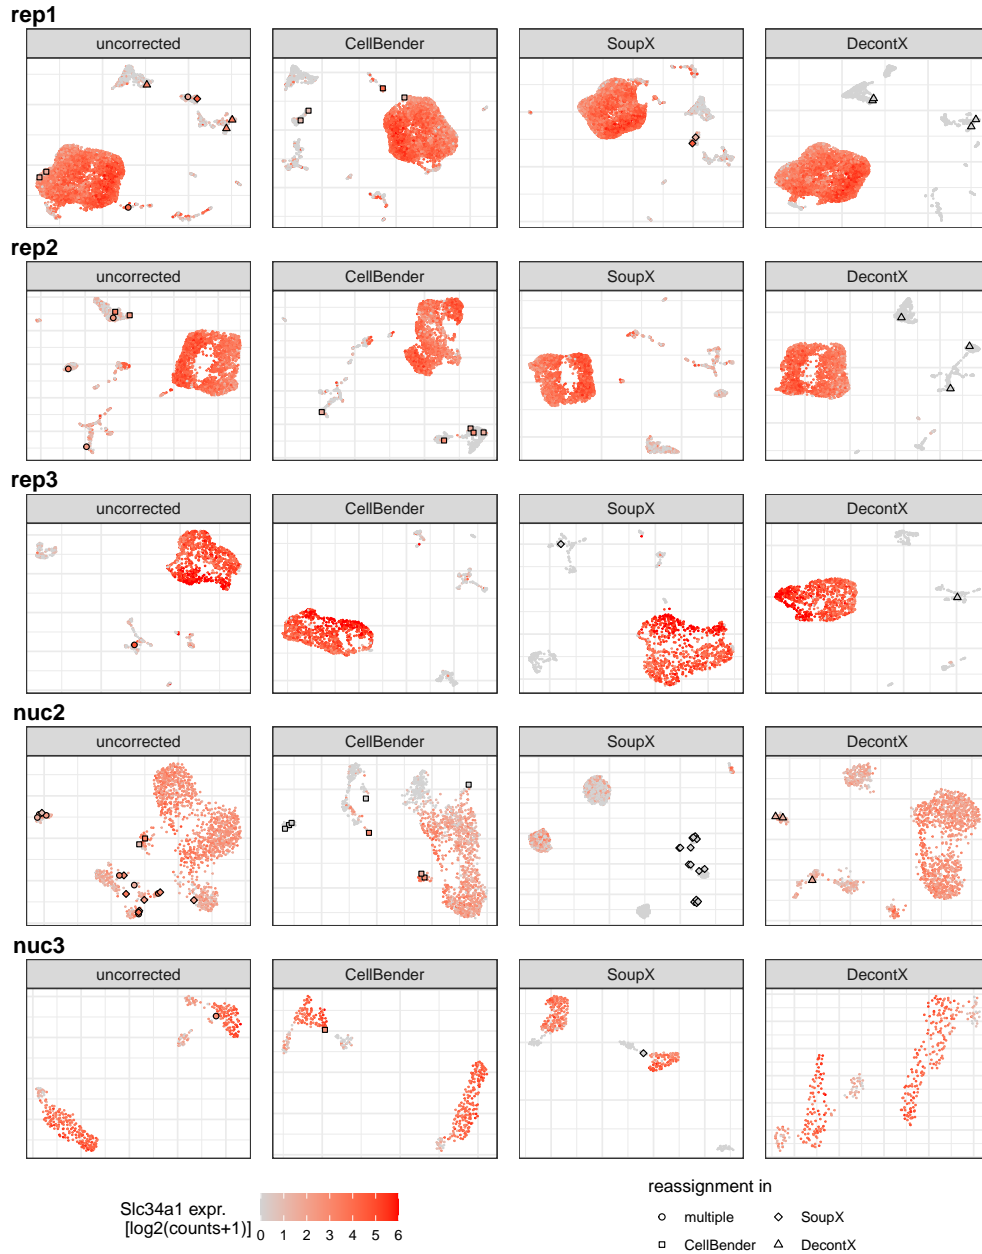

**Supplementary Figure S10. Detected expression levels of Slc34a1 before and after background noise correction.** Cells that were classified as PT cells in the uncorrected data, but got reassigned after correction, are highlighted.

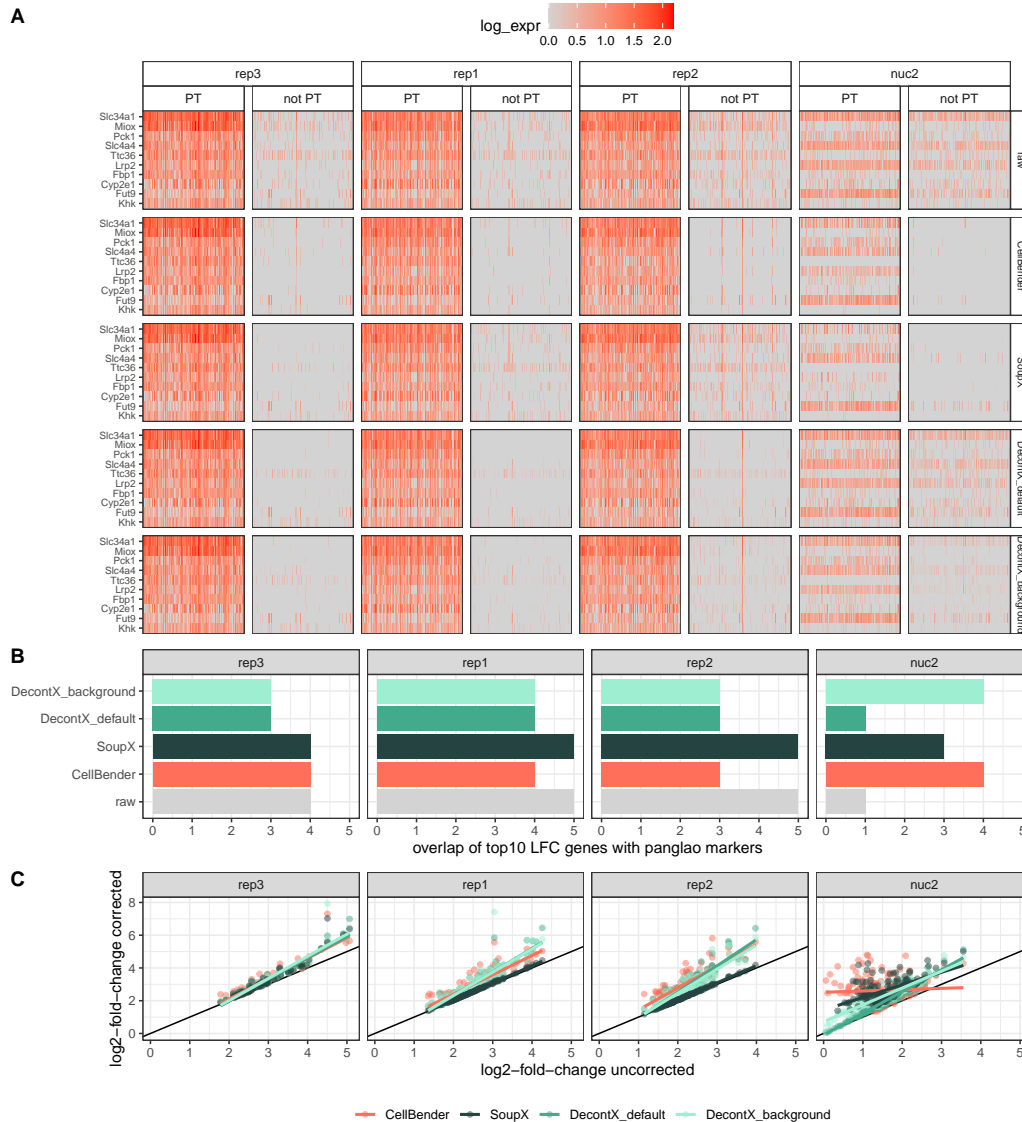

**Supplementary Figure S11. Effect of background noise correction on marker gene detection.** A) Heatmaps depicting the expression of 10 PT marker genes in 100 randomly sampled PT cells and 100 cells from other cell types. The first row of heatmaps is based on the uncorrected count matrix, rows 2-5 on the denoised count matrix output by different methods. B) Overlap of identified and known marker genes. Genes were ranked by log<sub>2</sub> fold change between PT and other cells and the overlap of the top 10 genes in this ranking with known marker genes for Proximal Tubule cells from PanglaoDB [17] is shown. C) Log<sub>2</sub> fold changes of PanglaoDB PT cell marker genes after background noise correction compared to the uncorrected data.

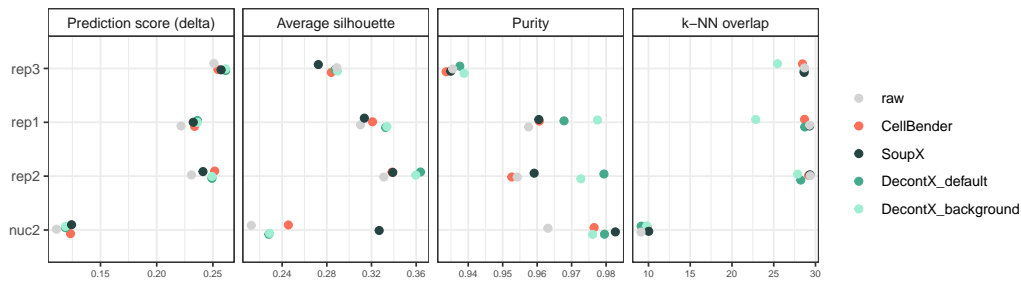

**Supplementary Figure S12. Evaluation metrics for cell type identification.** Prediction score: cell-wise score "delta" of reference based classification with SingleR [21]. Average silhouette: Mean of silhouette widths per cell type. Purity: Cluster purity calculated on cell type labels as ground truth and Louvain clusters as test labels. *k*-NN overlap: overlap of the *k*=50 nearest neighbors per cell compared to genotype-cleaned reference *k*-NN graph.

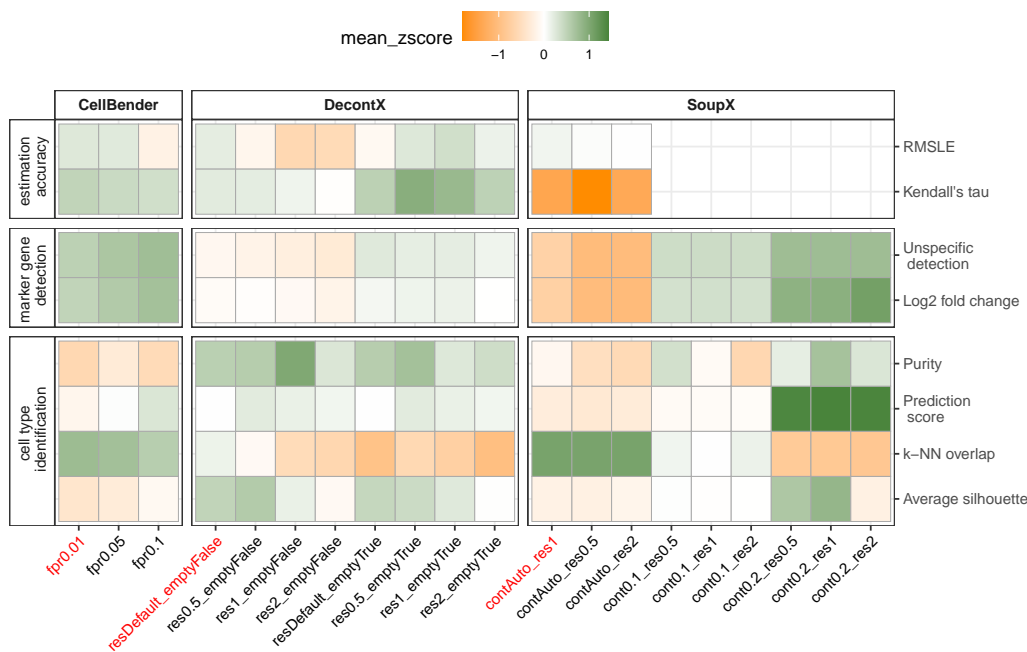

**Supplementary Figure S13. Evaluation of different parameter settings.** Combinations of the most impactful parameter/workflow choices of each method are evaluated. Default parameter settings are highlighted with red font color. For each metric, an average z-score across the replicates rep1, rep2, rep3 and nuc2 is shown, for which higher values indicate better performance. The following parameters were tuned: CellBender: *fpr* (0.01,0.05,0.1); DecontX: cluster labels *z* (resDefault: NULL, res0.5/1/2: vector of cluster labels from Louvain clustering with resolution 0.5/1/2), *background* (emptyFalse: NULL, emptyTrue: provide raw matrix containing empty droplets); SoupX: contamination fraction (contAuto: automatic estimation using *autoEstcont*, cont0.1/0.2: manually set using *setContaminationFraction* (0.1/0.2)), cluster labels (res0.5/1/2: vector of cluster labels from Louvain clustering with resolution 0.5/1/2)
